# Supplementary material for: Diastereoselective synthesis of quaternary α-amino acids from diketopiperazine templates
Source: Royal Society of Chemistry journal article supplement (doi:10.1039/b704475e), 2007-01-01
Supplement: b704475e.pdf [file b704475e.pdf]

## Supplementary Information

### Diastereoselective synthesis of quaternary $\alpha$ -amino acids from diketopiperazine templates

Stephen G. Davies, A. Christopher Garner, Jaqueline V. A. Ouzman, Paul M. Roberts, Andrew D. Smith, Emma J. Snow, James E. Thomson, Juan A. Tamayo and Richard J. Vickers.

*Department of Organic Chemistry, Chemistry Research Laboratory, University of Oxford, Mansfield Road, Oxford, OX1 3TA, UK*

e-mail: steve.davies@chem.ox.ac.uk

## Experimental

### General Experimental

All reactions involving organometallic or other moisture-sensitive reagents were carried out under a nitrogen or argon atmosphere using standard vacuum line techniques and glassware that was flame dried and cooled under nitrogen before use. Solvents were dried according to the procedure outlined by Grubbs and co-workers.<sup>1</sup> Water was purified by an Elix<sup>®</sup> UV-10 system. All other solvents were used as supplied (analytical or HPLC grade) without prior purification. Organic layers were dried over MgSO<sub>4</sub>. Thin layer chromatography was performed on aluminium plates coated with 60 F<sub>254</sub> silica. Plates were visualised using UV light (254 nm), iodine, 1% aq KMnO<sub>4</sub>, or 10% ethanolic phosphomolybdic acid. Flash column chromatography was performed on Kieselgel 60 silica.

Elemental analyses were recorded by the microanalysis service of the Inorganic Chemistry Laboratory, University of Oxford, UK. Melting points were recorded on a Gallenkamp Hot Stage apparatus and are uncorrected. Optical rotations were recorded on a Perkin-Elmer 241 polarimeter with a water-jacketed 10 cm cell. Specific rotations are reported in 10<sup>-1</sup> deg cm<sup>2</sup> g<sup>-1</sup> and concentrations in g/100 mL. IR spectra were recorded on Bruker Tensor 27 FT-IR spectrometer as either a thin film on NaCl plates (film) or a KBr disc (KBr), as stated. Selected characteristic peaks are reported in cm<sup>-1</sup>. NMR spectra were recorded on Bruker Avance spectrometers in the deuterated solvent stated. The field was locked by external referencing to the relevant deuterium resonance. Low-resolution mass spectra were recorded on either a VG MassLab 20-250 or

---

<sup>1</sup> A. B. Pangborn, M. A. Giardello, R. H. Grubbs, R. K. Rosen and F. J. Timmers, *Organometallics*, **1996**, *15*, 1518.

a Micromass Platform 1 spectrometer. Accurate mass measurements were run on either a Bruker MicroTOF and were internally calibrated with polyaniline in positive and negative modes, or a Micromass GCT instrument fitted with a Scientific Glass Instruments BPX5 column (15 m × 0.25 mm) using amyl acetate as a lock mass.

#### **General Procedure 1 for mono-lactim ether formation**

A mixture of DKP (1.0 eq) and Me<sub>3</sub>OBF<sub>4</sub> (2.0 eq) was stirred in BmimBF<sub>4</sub> for 96 h under vacuum before quenching with sat aq NaHCO<sub>3</sub> solution. The product was extracted with Et<sub>2</sub>O, dried, concentrated *in vacuo* and purified by flash column chromatography.

#### **General Procedure 2 for mono-lactim ether alkylation**

BuLi (solution in hexanes, 1.0 eq) was added dropwise to a stirred solution of template (1.0 eq) in THF at -78°C. After 45 minutes, the electrophile (1.1 eq) was added dropwise *via* syringe. The reaction solution was then allowed to warm slowly to rt. After 16 h, the reaction mixture was quenched with sat aq NH<sub>4</sub>Cl solution and stirred for a further 10 minutes. The product was then extracted with EtOAc, washed with H<sub>2</sub>O, dried, concentrated *in vacuo* and purified by flash column chromatography.

#### **General Procedure 3 for lactim-ether hydrolysis**

The alkylated template was dissolved in TFA and subjected to reflux for 4 days. After this time the solvent was removed *in vacuo*. The remaining solid residue was triturated with Et<sub>2</sub>O, filtered under suction and then dried under vacuum.

#### **General Procedure 4 for DKP hydrolysis**

The DKP was dissolved in conc aq HCl and subjected to reflux for 3 days. Concentration of the reaction mixture *in vacuo* yielded a mixture of amino acid hydrochloride salts which were dried under vacuum.

#### **General procedure 5 for formation of amino acid methyl esters**

SOCl<sub>2</sub> (3.0 eq) was added to a solution of amino acid hydrochloride salts (1.0 eq) in MeOH at 0°C, and subsequently set at reflux. After 16 h this solution was concentrated *in vacuo* to yield a mixture of amino acid methyl ester hydrochloride salts. This mixture was taken up into an aq solution and conc aq NH<sub>3</sub> was added dropwise until pH 10 was reached when it was extracted with DCM. The combined organic extracts

were dried and concentrated *in vacuo* to furnish a mixture of amino acid methyl esters. Valine methyl ester was distilled off under vacuum yielding the desired amino acid methyl ester.

**(3R,6S)-N(1),N(4)-Bis-*p*-methoxybenzyl-3-benzyl-3-methyl-6-*iso*-propyl-piperazine-2,5-dione 7**

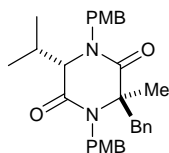

KHMDS (0.5 M in toluene, 1.47 mL, 0.731 mmol) was added dropwise to a stirred solution of DKP **3** (100 mg, 0.244 mmol) in THF (10 mL) at  $-78^{\circ}\text{C}$ . After 45 minutes, BnBr (58  $\mu\text{L}$ , 0.487 mmol) was added dropwise *via* syringe. The reaction solution was then allowed to warm slowly to rt. After 16 h, the reaction mixture was quenched with sat aq  $\text{NH}_4\text{Cl}$  solution and stirred for a further 10 minutes. The product was then extracted with EtOAc, washed with  $\text{H}_2\text{O}$ , dried and concentrated *in vacuo*. Purification *via* flash column chromatography (eluent 1:1 40-60° petrol:Et<sub>2</sub>O) gave **7** as a colourless oil (71 mg, 58%, 88% de);  $\nu_{\text{max}}$  (film) 2961, 2836, 1643, 1513;  $\delta_{\text{H}}$  (400 MHz;  $\text{CDCl}_3$ ) 0.67 (3H, d,  $J$  7.0,  $\text{CH}_3\text{CHCH}_3$ ), 0.90 (3H, d,  $J$  7.0,  $\text{CH}_3\text{CHCH}_3$ ), 1.75 (3H, s, C(3)Me), 2.07 (1H, m,  $\text{CH}_3\text{CHCH}_3$ ), 3.19 (1H, d,  $J$  3.3, C(6)H), 3.26 (1H, d,  $J$  14.1, CHHPh), 3.32 (1H, d,  $J$  14.1, CHHPh), 3.78 (3H, s, OMe), 3.81 (3H, s, OMe), 3.84 (1H, d,  $J$  14.9, CHHAr), 4.18 (1H, d,  $J$  14.7, CHHAr), 5.01 (1H, d,  $J$  14.9, CHHAr), 5.35 (1H, d,  $J$  14.7, CHHAr), 6.53-7.43 (13H, m, Ar, Ph);  $\delta_{\text{C}}$  (50 MHz;  $\text{CDCl}_3$ ) 16.0, 19.5, 27.5, 30.0, 44.6, 45.9, 46.6, 55.1, 61.6, 66.8, 113.7, 114.0, 126.6, 127.2, 128.5, 128.8, 129.6, 129.8, 130.0, 130.2, 130.4, 135.7, 159.0, 159.2, 165.5, 169.2;  $m/z$  (APCI<sup>+</sup>) 501 ( $[\text{M}+\text{H}]^+$ , 100%); HRMS (CI<sup>+</sup>)  $\text{C}_{31}\text{H}_{37}\text{N}_2\text{O}_4$  ( $[\text{M}+\text{H}]^+$ ) requires 501.2753; found 501.2756.

**(3R,6S)-N(1),N(4)-Bis-*p*-methoxybenzyl-3,6-di-*iso*-propyl-3-methyl-piperazine-2,5-dione 8**

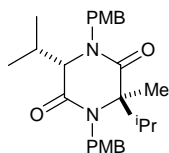

KHMDS (0.5 M in toluene, 1.47 mL, 0.731) was added dropwise to a stirred solution of DKP **3** (100 mg, 0.244 mmol) in THF (10 mL) at  $-78^{\circ}\text{C}$ . After 45 minutes, <sup>i</sup>PrI (74  $\mu\text{L}$ , 0.731 mmol) was added dropwise *via* syringe. The reaction solution was then allowed to warm slowly to rt. After 16 h, the reaction mixture was quenched with sat aq  $\text{NH}_4\text{Cl}$  solution and stirred for a further 10 minutes. The product was then extracted with EtOAc, washed with  $\text{H}_2\text{O}$ , dried and concentrated *in vacuo*. Purification *via* flash column chromatography (eluent 1:1 Et<sub>2</sub>O:cyclohexane) gave **8** as a white solid (40 mg, 36%, 86% de); mp

119°C;  $\nu_{\max}$  (KBr) 3435, 1653, 1512, 1246;  $\delta_{\text{H}}$  (400 MHz;  $\text{CDCl}_3$ ) 0.72 (3H, d,  $J$  7.2,  $\text{CH}_3\text{CHCH}_3$ ), 0.73 (3H, d,  $J$  7.2,  $\text{CH}_3\text{CHCH}_3$ ), 1.02 (3H, d,  $J$  7.0,  $\text{CH}_3\text{CHCH}_3$ ), 1.09 (3H, d,  $J$  6.8,  $\text{CH}_3\text{CHCH}_3$ ), 1.72 (3H, s,  $\text{C}(3)\text{Me}$ ), 2.15 (1H, m,  $\text{CH}_3\text{CHCH}_3$ ), 2.28 (1H, m,  $\text{CH}_3\text{CHCH}_3$ ), 3.78 (1H, d,  $J$  4.7,  $\text{C}(6)\text{H}$ ), 3.78 (3H, s,  $\text{OMe}$ ), 3.80 (3H, s,  $\text{OMe}$ ), 3.87 (1H, d,  $J$  14.5,  $\text{CHHAr}$ ), 4.27 (1H, d,  $J$  14.7,  $\text{CHHAr}$ ), 4.66 (1H, d,  $J$  14.7,  $\text{CHHAr}$ ), 5.32 (1H, d,  $J$  14.5,  $\text{CHHAr}$ ), 6.79-7.33 (13H, m,  $\text{Ar}$ );  $\delta_{\text{C}}$  (100 MHz;  $\text{CHCl}_3$ ) 16.1, 17.5, 18.1, 19.8, 24.4, 30.4, 37.5, 45.6, 46.7, 55.2, 55.3, 62.4, 68.0, 113.4, 113.6, 114.1, 114.2, 127.4, 129.9, 130.3, 130.4, 158.5, 159.2, 165.9, 167.5;  $m/z$  (APCI<sup>+</sup>) 453 ( $[\text{M}+\text{H}]^+$ , 6%), 121 (100); HRMS (ESI<sup>+</sup>)  $\text{C}_{27}\text{H}_{37}\text{N}_2\text{O}_4^+$  ( $[\text{M}+\text{H}]^+$ ) requires 453.2753; found 453.2731.

**(3*S*,6*S*)-*N*(1),*N*(4)-Bis-*p*-methoxybenzyl-3-benzyl-3-methyl-6-*iso*-propyl-piperazine-2,5-dione **9****

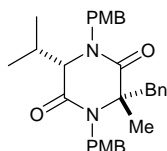

KHMDS (0.5 M in toluene, 15.0 mL, 7.49 mmol) was added dropwise to a stirred solution of DKP **4** (1.21 g, 2.50 mmol) in THF (120 mL) at  $-78^\circ\text{C}$ . After 45 minutes, MeI (1.55 mL, 25.0 mmol) was added dropwise *via* syringe. The reaction solution was then allowed to warm slowly to rt. After 16 h, the reaction mixture was quenched with sat aq  $\text{NH}_4\text{Cl}$  solution and stirred for a further 10 minutes. The product was then extracted with EtOAc, washed with  $\text{H}_2\text{O}$ , dried and concentrated *in vacuo*. Purification *via* flash column chromatography (eluent 1:1  $\text{Et}_2\text{O}$ :cyclohexane) gave **9** as a colourless oil (987 mg, 79%, 81% de);  $\nu_{\max}$  (film) 3018, 1651, 1513, 1218;  $\delta_{\text{H}}$  (400 MHz;  $\text{CDCl}_3$ ) 0.65 (3H, d,  $J$  6.8,  $\text{CH}_3\text{CHCH}_3$ ), 0.97 (3H, d,  $J$  7.0,  $\text{CH}_3\text{CHCH}_3$ ), 1.51 (1H, m,  $\text{CH}_3\text{CHCH}_3$ ), 1.52 (3H, s,  $\text{C}(3)\text{Me}$ ), 3.14 (1H, d,  $J$  14.0,  $\text{C}(3)\text{CHHPh}$ ), 3.38 (1H, d,  $J$  13.9,  $\text{C}(3)\text{CHHPh}$ ), 3.71 (1H, d,  $J$  5.0,  $\text{C}(6)\text{H}$ ), 3.78 (3H, s,  $\text{OMe}$ ), 3.80 (3H, s,  $\text{OMe}$ ), 3.86 (1H, d,  $J$  14.8,  $\text{CHHAr}$ ), 4.02 (1H, d,  $J$  15.7,  $\text{CHHAr}$ ), 5.06 (1H, d,  $J$  15.6,  $\text{CHHAr}$ ), 5.44 (1H, d,  $J$  14.8,  $\text{CHHAr}$ ), 6.78-7.31 (13H, m,  $\text{Ar}$ ,  $\text{Ph}$ );  $\delta_{\text{C}}$  (100 MHz;  $\text{CHCl}_3$ ) 18.7, 21.1, 26.9, 35.6, 44.3, 46.4, 49.0, 55.2, 55.3, 63.7, 66.8, 127.4, 128.1, 128.7, 129.2, 130.6, 135.7, 158.4, 159.2, 166.7, 169.1;  $m/z$  (APCI<sup>+</sup>) 501 ( $[\text{M}+\text{H}]^+$ , 8%), 121 (100); HRMS (ESI<sup>+</sup>)  $\text{C}_{31}\text{H}_{37}\text{N}_2\text{O}_4^+$  ( $[\text{M}+\text{H}]^+$ ) requires 501.2753; found 501.2749.

**(*S*)-*N*-(2-Bromoacetyl)-*N*-methyl-valine methyl ester **14****

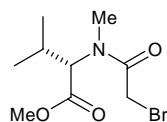

A solution of *N*-methyl-valine methyl ester **12** (2.52 g, 17.4 mmol) and Et<sub>3</sub>N (2.90 mL, 20.9 mmol) in DCM (20 mL) was added dropwise over 1 h to a solution of bromoacetyl bromide (2.26 mL, 26.1 mmol) in DCM (60 mL) at -78°C. The reaction mixture was allowed to warm to rt over 16 h, washed with H<sub>2</sub>O (100 mL), dried and concentrated *in vacuo*. Purification *via* flash column chromatography (eluent hexane:Et<sub>2</sub>O 2:1) gave **14** (3.68 g, 80%); [ $\alpha$ ]<sub>D</sub><sup>21</sup> -103.4 (*c* 1.5 in CHCl<sub>3</sub>);  $\nu_{\max}$  (film) 1740, 1654;  $\delta_{\text{H}}$  (500 MHz, PhMe-*d*<sub>8</sub>, 373K) 0.79 (3H, d, *J* 6.7, CH<sub>3</sub>CHCH<sub>3</sub>), 0.89 (3H, d, *J* 6.4, CH<sub>3</sub>CHCH<sub>3</sub>), 2.06-2.15 (1H, m, CH<sub>3</sub>CHCH<sub>3</sub>), 2.80 (3H, s, *NMe*), 3.44 (3H, s, *OMe*), 3.65 (2H, s, CH<sub>2</sub>Br), 3.85 (1H, app br s, <sup>1</sup>PrCH);  $\delta_{\text{C}}$  (125 MHz, PhMe-*d*<sub>8</sub>, 373K) 18.9, 19.7, 26.4, 28.3, 30.6, 51.2, 62.9, 167.0, 170.7; *m/z* (ESI<sup>+</sup>) 290 ([M+Na]<sup>+</sup>, <sup>81</sup>Br, 40%), 288 (40); HRMS (ESI<sup>+</sup>) C<sub>9</sub>H<sub>17</sub>BrNO<sub>3</sub> ([M+H]<sup>+</sup>, <sup>79</sup>Br) requires 266.0392; found 266.0393.

#### (*S*)-*N*(4)-Methyl-3-*iso*-propyl-piperazine-2,5-dione **16**

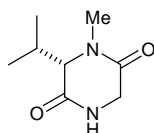

**14** (5.58 g, 21.0 mmol) was added to ethanol (200 mL) saturated with ammonia gas and stirred for 48 h. The reaction mixture was concentrated *in vacuo*. The residue was partitioned between EtOAc (200 mL) and H<sub>2</sub>O (200 mL), the aqueous layer was separated and the organic layer was washed with H<sub>2</sub>O (200 mL), dried and concentrated *in vacuo* to give **16** (2.86 g, 80%) as an orange crystalline solid; mp 74-75°C; [ $\alpha$ ]<sub>D</sub><sup>23</sup> +103.7 (*c* 1.2 in CHCl<sub>3</sub>);  $\nu_{\max}$  (KBr) 3206, 1658;  $\delta_{\text{H}}$  (400 MHz, CDCl<sub>3</sub>) 0.96 (3H, d, *J* 7.1, CH<sub>3</sub>CHCH<sub>3</sub>), 1.05 (3H, d, *J* 6.8, CH<sub>3</sub>CHCH<sub>3</sub>), 2.14-2.25 (1H, m, CH<sub>3</sub>CHCH<sub>3</sub>), 2.94 (3H, s, *NMe*), 3.58 (1H, d, *J* 4.8, C(3)*H*), 3.81 (1H, dd, *J* 17.6, 4.0, C(6)*HH*), 3.95 (1H, d, *J* 17.6, C(6)*HH*) 7.44 (1H, br, s, *NH*);  $\delta_{\text{C}}$  (100 MHz, CDCl<sub>3</sub>) 18.0, 19.3, 32.2, 34.4, 45.0, 68.4, 164.8, 167.7; *m/z* (APCI<sup>+</sup>) 171 ([M+H]<sup>+</sup>, 100%); HRMS (ESI<sup>+</sup>) C<sub>8</sub>H<sub>15</sub>N<sub>2</sub>O<sub>2</sub> ([M+H]<sup>+</sup>) requires 171.1134; found 171.1137.

#### (*S*)-*N*(1)-Methyl-5-methoxy-6-*iso*-propyl-3,6-dihydropyrazine-2-one **18**

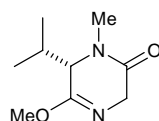

Following *General Procedure 1*, DKP **16** (2.53 g, 14.9 mmol) and Me<sub>3</sub>OBF<sub>4</sub> (4.40 mg, 29.8 mmol) in BmimBF<sub>4</sub> (15 mL) gave, after purification *via* flash column chromatography (eluent EtOAc), **18** as a colourless oil (1.66 g, 61%); [ $\alpha$ ]<sub>D</sub><sup>23</sup> +190.3 (*c* 1.2 in CHCl<sub>3</sub>);  $\nu_{\max}$  (film) 1695, 1657;  $\delta_{\text{H}}$  (400 MHz, CDCl<sub>3</sub>)

0.68 (3H, d,  $J$  6.8,  $\text{CH}_3\text{CHCH}_3$ ), 0.80 (3H, d,  $J$  7.1,  $\text{CH}_3\text{CHCH}_3$ ), 1.94-2.02 (1H, m,  $\text{CH}_3\text{CHCH}_3$ ), 2.74 (3H, s, *NMe*), 3.45 (3H, s, *OMe*), 3.53 (1H, m, C(6)*H*), 3.79 (1H, dd,  $J$  20.8, 1.2, C(3)*HH*), 3.88 (1H, dd,  $J$  20.8, 1.2, C(3)*HH*);  $\delta_{\text{C}}$  (100 MHz,  $\text{CDCl}_3$ ) 17.5, 19.0, 31.7, 33.2, 50.4, 52.5, 65.0, 160.5, 167.7;  $m/z$  ( $\text{ESI}^+$ ) 185 ( $[\text{M}+\text{H}]^+$ , 100%); HRMS ( $\text{ESI}^+$ )  $\text{C}_9\text{H}_{17}\text{N}_2\text{O}_2$  ( $[\text{M}+\text{H}]^+$ ) requires 185.1290; found 185.1287.

**(S)-N(1)-p-Methoxybenzyl-5-methoxy-6-iso-propyl-3,6-dihydropyrazine-2-one 19**

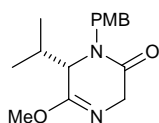

Following *General Procedure 1*, DKP **17** (6.20 g, 22.4 mmol) and Me<sub>3</sub>OBF<sub>4</sub> (6.64 g, 44.9 mmol) in BmimBF<sub>4</sub> (30 mL) gave, after purification *via* flash column chromatography (eluent Et<sub>2</sub>O), **19** as a pale brown crystalline solid (1.66 g, 61%); mp 94-96 °C (DCM-heptane);  $[\alpha]_D^{23} +23.4$  (*c* 1.0 in CHCl<sub>3</sub>);  $\nu_{\max}$  (KBr) 1697, 1658;  $\delta_{\text{H}}$  (400 MHz, CDCl<sub>3</sub>) 0.92 (3H, d, *J* 6.4, CH<sub>3</sub>CHCH<sub>3</sub>), 1.02 (3H, d, *J* 7.0, CH<sub>3</sub>CHCH<sub>3</sub>), 2.16-2.24 (1H, m, CH<sub>3</sub>CHCH<sub>3</sub>), 3.67 (3H, s, C(5)OMe), 3.69 (1H, ddd, *J* 2.0, 1.1, 1.0, C(6)H), 3.82 (3H, s, ArOMe), 3.84 (1H, d, *J* 14.9, NCHHAr), 4.12 (1H, dd, *J* 19.6, 1.1, C(3)HH), 4.24 (1H, dd, *J* 19.6, 1.0, C(3)HH), 5.42 (1H, d, *J* 14.9, NCHHAr), 6.83-6.89 (2H, m, Ar), 7.15-7.18 (2H, m, Ar);  $\delta_{\text{C}}$  (100 MHz, CDCl<sub>3</sub>) 17.4, 19.9, 31.8, 46.5, 50.9, 52.7, 55.2, 60.9, 114.2, 127.9, 129.6, 159.2, 161.0, 168.0; *m/z* (ESI<sup>+</sup>) 313 ([M+Na]<sup>+</sup>, 83%), 291 (100); HRMS (ESI<sup>+</sup>) C<sub>16</sub>H<sub>23</sub>N<sub>2</sub>O<sub>3</sub> ([M+H]<sup>+</sup>) requires 291.1709; found 291.1707.

**(3R,6S)- and (3S,6S)-N(1),3-Dimethyl-5-methoxy-6-iso-propyl-3,6-dihydropyrazine-2-one**

**(3R,6S)-trans-20 and (3S,6S)-cis-21**

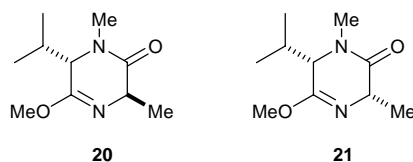

Following *General procedure 2*, BuLi (1.6 M in hexanes, 1.11 mL, 1.77 mmol), **18** (326 mg, 1.77 mmol) and MeI (0.12 mL, 1.95 mmol) in THF (15 mL), gave a 84.5:14.5 mixture of *trans*-**20**:*cis*-**21**. Purification *via* flash column chromatography (eluent Et<sub>2</sub>O) gave *trans*-**20** as a colourless oil (200 mg, 57%, >98% de) and *cis*-**21** as a colourless oil (46 mg, 13%, >98% de).

Data for *trans*-**20**:  $[\alpha]_D^{23} +212$  (*c* 1.1 in CHCl<sub>3</sub>);  $\nu_{\max}$  (film) 1696, 1653;  $\delta_{\text{H}}$  (400 MHz, CDCl<sub>3</sub>) 0.78 (3H, d, *J* 7.0, CH<sub>3</sub>CHCH<sub>3</sub>), 0.91 (3H, d, *J* 7.0, CH<sub>3</sub>CHCH<sub>3</sub>), 1.35 (3H, d, *J* 7.3, C(3)Me), 2.01-2.11 (1H, m, CH<sub>3</sub>CHCH<sub>3</sub>), 2.82 (3H, s, NMe), 3.65 (3H, s, OMe) 3.61 (1H, dd, *J* 4.0, 1.8, C(6)H), 3.88 (1H, td, *J* 7.3, 1.8, C(3)H);  $\delta_{\text{C}}$  (100 MHz, CDCl<sub>3</sub>) 17.8, 19.4, 20.3, 31.8, 33.7, 52.5, 53.8, 65.9, 159.5, 171.1; *m/z* (ESI<sup>+</sup>) 199 ([M+H]<sup>+</sup>, 100%); HRMS (ESI<sup>+</sup>) C<sub>10</sub>H<sub>19</sub>N<sub>2</sub>O<sub>2</sub> ([M+H]<sup>+</sup>) requires 199.1447; found 199.1446.

Data for *cis*-**21**:  $[\alpha]_D^{23} +29.6$  (*c* 0.7 in CHCl<sub>3</sub>);  $\nu_{\max}$  (film) 1682, 1650;  $\delta_{\text{H}}$  (400 MHz, CDCl<sub>3</sub>) 0.89 (3H, d, *J* 7.1, CH<sub>3</sub>CHCH<sub>3</sub>), 1.06 (3H, d, *J* 7.1, CH<sub>3</sub>CHCH<sub>3</sub>), 1.45 (3H, d, *J* 7.3, C(3)Me), 2.07-2.16 (1H, m, CH<sub>3</sub>CHCH<sub>3</sub>), 2.93 (3H, s, NMe), 3.65 (3H, s, OMe), 3.75 (1H, dd, *J* 3.3, 1.9, C(6)H), 4.17 (1H, dt, *J* 7.3, 1.9,

C(3)H);  $\delta_{\text{C}}$  (100 MHz,  $\text{CDCl}_3$ ) 18.1, 19.8, 21.4, 30.8, 33.7, 52.4, 55.1, 65.2, 158.0, 170.7;  $m/z$  ( $\text{ESI}^+$ ) 199 ( $[\text{M}+\text{H}]^+$ , 100%); HRMS ( $\text{ESI}^+$ )  $\text{C}_{10}\text{H}_{19}\text{N}_2\text{O}_2$  ( $[\text{M}+\text{H}]^+$ ) requires 199.1447; found 199.1448.

**(3R,6S)- and (3S,6S)-N(1)-p-Methoxybenzyl-3-methyl-5-methoxy-6-iso-propyl-3,6-dihydropyrazine-2-one (3R,6S)-trans-22 and (3S,6S)-cis-23**

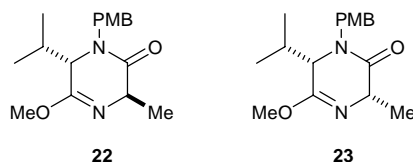

Following *General procedure 2*, BuLi (2.5 M in hexanes, 0.28 mL, 0.70 mmol), **19** (184 mg, 0.63 mmol) and MeI (40  $\mu\text{L}$ , 0.70 mmol) in THF (10 mL), gave a 84:16 mixture of *trans*-**22**:*cis*-**23**. Purification *via* flash column chromatography (eluent 5:2 40-60° petrol:Et<sub>2</sub>O) gave *trans*-**22** as a colourless oil (119 mg, 62%, >98% de) and *cis*-**23** as a colourless oil (8 mg, 4%, >98% de).

Data for *trans*-**22**:  $[\alpha]_{\text{D}}^{23} +22.5$  (*c* 1.2 in  $\text{CHCl}_3$ );  $\nu_{\text{max}}$  (film) 1694, 1652;  $\delta_{\text{H}}$  (400 MHz,  $\text{CDCl}_3$ ) 0.90 (3H, d, *J* 7.0,  $\text{CH}_3\text{CHCH}_3$ ), 1.02 (3H, d, *J* 7.0,  $\text{CH}_3\text{CHCH}_3$ ), 1.54 (3H, d, *J* 7.4, C(3)Me), 2.16-2.24 (1H, m,  $\text{CH}_3\text{CHCH}_3$ ), 3.64 (3H, s, C(5)OMe), 3.67 (1H, dd, *J* 5.9, 1.5, C(6)H), 3.79 (3H, s, ArOMe), 3.84 (1H, d, *J* 14.8, NCHHAr), 4.11 (1H, dq, *J* 7.4, 1.5, C(3)H), 5.41 (1H, d, *J* 14.8, NCHHAr), 6.83-6.87 (2H, m, Ar), 7.11-7.14 (2H, m, Ar);  $\delta_{\text{C}}$  (100 MHz,  $\text{CDCl}_3$ ) 17.7, 20.0, 20.7, 31.5, 46.9, 52.6, 54.0, 55.2, 61.9, 114.1, 128.3, 129.4, 159.1, 159.9, 171.3;  $m/z$  (APCI<sup>+</sup>) 305 ( $[\text{M}+\text{H}]^+$ , 100%); HRMS ( $\text{ESI}^+$ )  $\text{C}_{17}\text{H}_{25}\text{N}_2\text{O}_3$  ( $[\text{M}+\text{H}]^+$ ) requires 305.1865; found 305.1862.

Data for *cis*-**23**:  $\nu_{\text{max}}$  (film) 1693, 1654;  $\delta_{\text{H}}$  (400 MHz,  $\text{CDCl}_3$ ) 0.88 (3H, d, *J* 7.0,  $\text{CH}_3\text{CHCH}_3$ ), 0.98 (3H, d, *J* 7.0,  $\text{CH}_3\text{CHCH}_3$ ), 1.52 (3H, d, *J* 7.2, C(3)Me), 2.11-2.19 (1H, m,  $\text{CH}_3\text{CHCH}_3$ ), 3.63 (1H, dd, *J* 4.4, 1.6, C(6)H), 3.65 (3H, s, C(5)OMe), 3.81 (1H, d, *J* 14.9, NCHHAr), 3.81 (3H, s, ArOMe), 4.09 (1H, dq, *J* 7.2, 1.6, C(3)H), 5.35 (1H, d, *J* 14.9, NCHHAr), 6.79-6.83 (2H, m, Ar), 7.09-7.13 (2H, m, Ar);  $\delta_{\text{C}}$  (100 MHz,  $\text{CDCl}_3$ ) 17.7, 20.0, 20.7, 31.5, 46.9, 52.6, 55.4, 54.1, 61.7, 114.1, 127.9, 129.8, 156.8, 159.9, 171.2;  $m/z$  ( $\text{ESI}^+$ ) 305 ( $[\text{M}+\text{H}]^+$ , 100%); HRMS ( $\text{ESI}^+$ )  $\text{C}_{17}\text{H}_{25}\text{N}_2\text{O}_3$  ( $[\text{M}+\text{H}]^+$ ) requires 305.1865; found 305.1853.

**(3R,6S)-N(1)-Methyl-3-benzyl-5-methoxy-6-iso-propyl-3,6-dihydropyrazine-2-one trans-24**

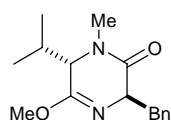

Following *General procedure 2*, BuLi (1.6 M in hexanes, 1.23 mL, 1.97 mmol), **18** (362 mg, 1.97 mmol) and BnBr (0.26 mL, 2.16 mmol) in THF (15 mL), gave a >99:<1 mixture of *trans*-**24**:*cis*-**25**. Purification



via flash column chromatography (eluent 2:1 hexane:Et<sub>2</sub>O) gave *trans*-**24** as a colourless oil (0.44 g, 82%, >98% de); C<sub>16</sub>H<sub>22</sub>N<sub>2</sub>O<sub>2</sub> requires C, 70.0; H, 8.1; N, 10.2%; found C, 69.8; H, 8.4; N, 10.1%; [ $\alpha$ ]<sub>D</sub><sup>22</sup> +129.0 (*c* 0.9 in CHCl<sub>3</sub>);  $\nu_{\max}$  (film) 1699, 1652;  $\delta_{\text{H}}$  (400 MHz, CDCl<sub>3</sub>) 0.82 (3H, d, *J* 7.0, CH<sub>3</sub>CHCH<sub>3</sub>), 0.97 (3H, d, *J* 7.0, CH<sub>3</sub>CHCH<sub>3</sub>), 2.04-2.16 (1H, m, CH<sub>3</sub>CHCH<sub>3</sub>), 2.85 (3H, s, NMe), 3.12 (1H, dd, *J* 13.3, 7.0, C(3)CHH), 3.33 (1H, dd, *J* 13.3, 4.3, C(3)CHH), 3.54 (1H, dd, *J* 3.8, 2.0, C(6)H), 3.64 (3H, s, OMe), 4.20 (1H, ddd, *J* 7.0, 4.3, 2.0, C(3)H), 7.11-7.29 (5H, m, Ph);  $\delta_{\text{C}}$  (100 MHz, CDCl<sub>3</sub>) 17.5, 19.4, 31.7, 33.6, 39.6, 52.6, 59.3, 65.4, 126.0, 127.6, 130.3, 138.8, 159.0, 169.6; *m/z* (ESI<sup>+</sup>) 275 ([M+H]<sup>+</sup>, 100%); HRMS (ESI<sup>+</sup>) C<sub>16</sub>H<sub>23</sub>N<sub>2</sub>O<sub>2</sub> ([M+H]<sup>+</sup>) requires 275.1760; found 275.1760.

**(3*S*,6*S*)-N(1)-Methyl-3-benzyl-5-methoxy-6-*iso*-propyl-3,6-dihydro-pyrazine-2-one *cis*-25**

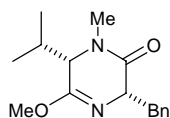

BuLi (1.6 M in hexanes, 0.34 mL, 0.55 mmol) was added dropwise to a stirred solution of *trans*-**24** (150 mg, 0.55 mmol) in THF (10 mL) at -78°C. After 45 min, AcOH (47  $\mu$ L, 0.82 mmol) was added and the reaction mixture was allowed to warm to rt over 16 h. The mixture was diluted with EtOAc (10 mL), washed with H<sub>2</sub>O (20 mL), dried, and concentrated *in vacuo* to give a 25:75 mixture of *trans*-**24**:*cis*-**25**. Purification *via* flash column chromatography (eluent 1:2 40-60° petrol:Et<sub>2</sub>O) gave *trans*-**24** as a colourless oil (23 mg, 15%, >98% de) and *cis*-**25** as a colourless oil (48 mg, 32%, >98% de).

Data for *cis*-**25**: [ $\alpha$ ]<sub>D</sub><sup>23</sup> +7.5 (*c* 1.0 in CHCl<sub>3</sub>);  $\nu_{\max}$  (film) 1698, 1651;  $\delta_{\text{H}}$  (400 MHz, CDCl<sub>3</sub>) 0.77 (3H, d, *J* 7.1, CH<sub>3</sub>CHCH<sub>3</sub>), 1.04 (3H, d, *J* 7.1, CH<sub>3</sub>CHCH<sub>3</sub>), 1.95-2.05 (1H, m, CH<sub>3</sub>CHCH<sub>3</sub>), 2.88 (1H, dd, *J* 13.4, 9.3, C(3)CHH), 2.97 (3H, s, NMe), 3.39 (1H, dd, *J* 13.4, 3.9, C(3)CHH), 3.63 (3H, s, OMe), 3.75 (1H, dd, *J* 3.5, 2.3, C(6)H), 4.35 (1H, ddd, *J* 9.3, 3.9, 2.3, C(3)H), 7.20-7.30 (5H, m, Ph);  $\delta_{\text{C}}$  (100 MHz, CDCl<sub>3</sub>) 17.8, 20.0, 31.0, 34.0, 41.5, 52.5, 60.8, 65.0, 126.3, 128.1, 129.8, 138.7, 158.0, 169.4; *m/z* (ESI<sup>+</sup>) 275 ([M+H]<sup>+</sup>, 100%); HRMS (ESI<sup>+</sup>) C<sub>16</sub>H<sub>23</sub>N<sub>2</sub>O<sub>2</sub> ([M+H]<sup>+</sup>) requires 275.1760; found 275.1766.

**(3*R*,6*S*)-N(1)-*p*-Methoxybenzyl-3-benzyl-5-methoxy-6-*iso*-propyl-3,6-dihydropyrazine-2-one *trans*-26**

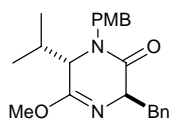

Following *General procedure 2*, BuLi (1.6 M in hexanes, 6.39 mL, 10.2 mmol), **19** (2.70 g, 9.29 mmol), and BnBr (1.22 mL, 10.2 mmol) in THF (120 mL), gave a >99:<1 mixture of *trans*-**26**:*cis*-**27**. Purification *via*

flash column chromatography (eluent 7:3 40-60° petrol:EtOAc) gave *trans*-**26** as a colourless oil (3.29 g, 94%, >98% de);  $[\alpha]_D^{22} +3.1$  (*c* 1.1 in CHCl<sub>3</sub>);  $\nu_{\max}$  (film) 1648;  $\delta_{\text{H}}$  (400 MHz, CDCl<sub>3</sub>) 0.88 (3H, d, *J* 7.0, CH<sub>3</sub>CHCH<sub>3</sub>), 0.98 (3H, d, *J* 7.0, CH<sub>3</sub>CHCH<sub>3</sub>), 2.12-2.20 (1H, m, CH<sub>3</sub>CHCH<sub>3</sub>), 3.37-3.39 (2H, m, C(3)CH<sub>2</sub>), 3.50 (1H, dd, *J* 5.0, 1.3, C(6)H), 3.68 (3H, s, C(5)OMe), 3.72 (1H, d, *J* 15.2, NCHHAr), 3.77 (3H, s, ArOMe), 4.40 (1H, td, *J* 4.6, 1.3, C(3)H), 5.44 (1H, d, *J* 15.2, NCHHAr), 6.72-6.76 (4H, m, Ar), 7.26-7.28 (3H, m, Ph), 7.35-7.37 (2H, m, Ph);  $\delta_{\text{C}}$  (100 MHz, CDCl<sub>3</sub>) 17.3, 19.8, 31.3, 39.6, 46.1, 52.5, 55.2, 59.3, 60.9, 114.1, 126.1, 127.7, 129.1, 130.7, 127.3, 138.4, 158.9, 159.1, 160.3; *m/z* (ESI<sup>+</sup>) 381 ([M+H]<sup>+</sup>, 100%); HRMS (ESI<sup>+</sup>) C<sub>23</sub>H<sub>29</sub>N<sub>2</sub>O<sub>3</sub> ([M+H]<sup>+</sup>) requires 381.2178; found 381.2180.

**(3*S*,6*S*)-*N*(1)-*p*-Methoxybenzyl-3-benzyl-5-methoxy-6-*iso*-propyl-3,6-dihydropyrazine-2-one *cis*-27**

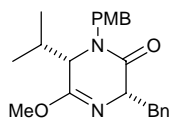

BuLi (1.6 M in hexanes, 0.33 mL, 0.52 mmol) was added dropwise to a stirred solution of *trans*-**26** (198 mg, 0.52 mmol) in THF (20 mL) at -78°C. After 45 min, AcOH (45  $\mu$ L, 0.78 mmol) was added and the reaction mixture was allowed to warm to rt over 16 h. The mixture was diluted with EtOAc (10 mL), washed with H<sub>2</sub>O (20 mL), dried, and concentrated *in vacuo* to give a 25:75 mixture of *trans*-**26**:*cis*-**27**. Purification *via* flash column chromatography (eluent 7:3 hexane:Et<sub>2</sub>O) gave *trans*-**26** as a colourless oil (47 mg, 24%, >98% de) and *cis*-**27** as a colourless oil (115 mg, 58%, >98% de).

Data for *cis*-**27**:  $[\alpha]_D^{23} +7.5$  (*c* 0.9 in CHCl<sub>3</sub>);  $\nu_{\max}$  (film) 1696, 1651;  $\delta_{\text{H}}$  (400 MHz, CDCl<sub>3</sub>) 0.76 (3H, d, *J* 7.0, CH<sub>3</sub>CHCH<sub>3</sub>), 1.05 (3H, d, *J* 7.0, CH<sub>3</sub>CHCH<sub>3</sub>), 2.01-2.10 (1H, m, CH<sub>3</sub>CHCH<sub>3</sub>), 2.96 (1H, dd, *J* 13.2, 9.5, C(3)CHH), 3.45 (1H, dd, *J* 13.2, 4.1, C(3)CHH), 3.59 (3H, s, C(5)OMe), 3.77 (1H, dd, *J* 4.3, 2.0, C(6)H), 3.80 (3H, s, ArOMe), 3.90 (1H, d, *J* 14.9, NCHHAr), 4.44 (1H, ddd, *J* 9.5, 4.1, 2.0, C(3)H), 5.43 (1H, d, *J* 14.9, NCHHAr), 6.86-6.88, (2H, m, Ar), 7.16-7.18 (2H, m, Ar), 7.30-7.35 (5H, m, Ph);  $\delta_{\text{C}}$  (100 MHz, CDCl<sub>3</sub>) 17.4, 20.5, 30.3, 41.7, 46.5, 52.4, 55.2, 60.7, 61.1, 114.1, 126.3, 128.1, 129.7, 129.8, 128.0, 138.8, 158.0, 159.2, 169.3; *m/z* (ESI<sup>+</sup>) 403 ([M+Na]<sup>+</sup>, 20%), 381 (100); HRMS (ESI<sup>+</sup>) C<sub>23</sub>H<sub>29</sub>N<sub>2</sub>O<sub>3</sub> ([M+H]<sup>+</sup>) requires 381.2178; found 381.2168.

**(6*S*,3*R*)-*N*(1)-Methyl-3,6-di-*iso*-propyl-5-methoxy-3,6-dihydropyrazine-2-one *trans*-28**

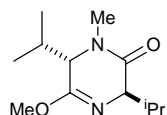

Following *General procedure 2*, BuLi (1.6 M in hexanes, 2.54 mL, 4.07 mmol), **18** (750 mg, 4.07 mmol), and <sup>i</sup>PrI (0.55 mL, 4.48 mmol) in THF (50 mL), gave a 94:6 mixture of *trans*-**28**:*cis*-**29**. Purification via flash column chromatography (eluent 1:1 30-40° petrol:Et<sub>2</sub>O) gave *trans*-**28** as a pale yellow crystalline solid (892 mg, 84%, >98% de); mp 58-59°C; [ $\alpha$ ]<sub>D</sub><sup>22</sup> +208 (*c* 1.0 in CHCl<sub>3</sub>);  $\nu_{\max}$  (KBr) 1698, 1646;  $\delta_{\text{H}}$  (400 MHz, CDCl<sub>3</sub>) 0.68 (3H, d, *J* 6.8, C(3)CHMeMe), 0.88 (3H, d, *J* 7.2, C(6)CHMeMe), 1.04 (3H, d, *J* 7.2, C(6)CHMeMe), 1.11 (3H, d, *J* 6.8, C(3)CHMeMe), 2.15-2.24 (1H, m, C(6)CHMe<sub>2</sub>), 2.60-2.69 (1H, m, C(3)CHMe<sub>2</sub>), 2.96 (3H, s, NMe), 3.71 (3H, s, OMe), 3.75 (1H, dd, *J* 3.4, 2.0, C(6)H), 3.82 (1H, dd, *J* 2.4, 2.0, C(3)H);  $\delta_{\text{C}}$  (100 MHz, CDCl<sub>3</sub>) 16.1, 19.8, 17.4, 19.3, 30.6, 31.7, 33.4, 52.2, 62.5, 65.2, 159.0, 170.3; *m/z* (ESI<sup>+</sup>) 249 ([M+Na]<sup>+</sup>, 70%); HRMS (ESI<sup>+</sup>) C<sub>12</sub>H<sub>23</sub>N<sub>2</sub>O<sub>2</sub> ([M+H]<sup>+</sup>) requires 227.1760; found 227.1750.

**(3R,6S)-N(1)-p-Methoxybenzyl-3,6-di-iso-propyl-5-methoxy-3,6-dihydropyrazine-2-one trans-30**

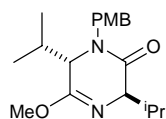

Following *General procedure 2*, BuLi (1.6 M in hexanes, 0.33 mL, 0.52 mmol), **19** (151 mg, 0.52 mmol) and <sup>i</sup>PrI (57.2  $\mu$ L, 0.57 mmol) in THF (10 mL), gave a 97.5:2.5 mixture of *trans*-**30**:*cis*-**31**. Purification via flash column chromatography (eluent 2:1 pentane:Et<sub>2</sub>O) gave *trans*-**30** as a colourless oil (108 mg, 62%, >98% de); C<sub>19</sub>H<sub>28</sub>N<sub>2</sub>O<sub>3</sub> requires C, 68.7; H, 8.5; N, 8.4%; found C, 68.4; H, 8.6; N, 8.3%; [ $\alpha$ ]<sub>D</sub><sup>23</sup> +39.3 (*c* 1.10 in CHCl<sub>3</sub>);  $\nu_{\max}$  (film) 1704, 1651;  $\delta_{\text{H}}$  (400 MHz, CDCl<sub>3</sub>) 0.71 (3H, d, *J* 6.6, C(3)CHMeMe), 0.87 (3H, d, *J* 7.1, C(6)CHMeMe), 1.00 (3H, d, *J* 7.1, C(6)CHMeMe), 1.12 (3H, d, *J* 7.1, C(3)CHMeMe), 2.15-2.24 (1H, m, C(6)CHMe<sub>2</sub>), 2.65-2.76 (1H, m, C(3)CHMe<sub>2</sub>), 3.65 (3H, s, C(5)OMe), 3.67 (1H, dd, *J* 3.5, 1.8, C(6)H), 3.77 (3H, s, ArOMe), 3.77 (1H, d, *J* 14.8, NCHHAr), 3.88 (1H, dd, *J* 2.8, 1.8, C(3)H), 5.48 (1H, d, *J* 14.8, NCHHAr), 6.81-6.86 (2H, m, Ar), 7.09-7.14 (2H, m, Ar);  $\delta_{\text{C}}$  (100 MHz, CDCl<sub>3</sub>) 16.2, 17.3, 19.9, 20.0, 30.8, 31.4, 46.2, 52.3, 55.2, 60.8, 62.6, 114.1, 128.4, 129.4, 159.1, 159.2, 170.2; *m/z* (ESI<sup>+</sup>) 333 ([M+H]<sup>+</sup>, 100%); HRMS (ESI<sup>+</sup>) C<sub>19</sub>H<sub>29</sub>N<sub>2</sub>O<sub>3</sub> ([M+H]<sup>+</sup>) requires 333.2178; found 333.2177.

**(S)-N(1)-p-Methoxybenzyl-3,3-dimethyl-5-methoxy-6-iso-propyl-3,6-dihydropyrazine-2-one 32**

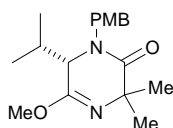

Following *General procedure 2*, BuLi (2.5 M in hexanes, 0.23 mL, 0.57 mmol), *trans*-**22** (174 mg, 0.57 mmol) and MeI (32  $\mu$ L, 0.63 mmol) in THF (10 mL) gave, after purification via flash column

chromatography (eluent 2:1 30-40° petrol:Et<sub>2</sub>O), **32** as a colourless oil (115 mg, 63%);  $[\alpha]_D^{22}$  -8.5 (*c* 0.9 in CHCl<sub>3</sub>);  $\nu_{\max}$  (film) 1702, 1634;  $\delta_H$  (400 MHz, CDCl<sub>3</sub>) 0.87 (3H, d, *J* 6.8, CH<sub>3</sub>CHCH<sub>3</sub>), 1.04 (3H, d, *J* 7.1, CH<sub>3</sub>CHCH<sub>3</sub>), 1.47 (3H, s, C(3)Me<sub>A</sub>), 1.49 (3H, s, C(3)Me<sub>B</sub>), 2.14-2.22 (1H, m, CH<sub>3</sub>CHCH<sub>3</sub>), 3.61 (3H, s, C(5)OMe), 3.72 (1H, d, *J* 2.8, C(6)H), 3.80 (3H, s, ArOMe), 3.80 (1H, d, *J* 14.7, NCHHAr), 5.46 (1H, d, *J* 14.7, NCHHAr), 6.84-6.88 (2H, m, Ar), 7.11-7.16 (2H, m, Ar);  $\delta_C$  (100 MHz, CDCl<sub>3</sub>) 17.5, 20.4, 29.1, 31.6, 29.9, 45.9, 52.0, 55.2, 57.9, 61.0, 114.1, 128.3, 129.4, 155.7, 159.1, 173.4; *m/z* (ESI<sup>+</sup>) 319 ([M+H]<sup>+</sup>, 100%); HRMS (ESI<sup>+</sup>) C<sub>18</sub>H<sub>27</sub>N<sub>2</sub>O<sub>3</sub> ([M+H]<sup>+</sup>) requires 319.2022; found 319.2024.

**(S)-N(1)-p-Methoxybenzyl-3,3-dibenzyl-5-methoxy-6-iso-propyl-3,6-dihydropyrazine-2-one 33**

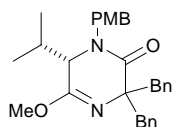

Following *General procedure 2*, BuLi (1.6 M in hexanes, 0.24 mL, 0.38 mmol), *trans*-**26** (133 mg, 0.35 mmol) and BnBr (46  $\mu$ L, 0.38 mmol) in THF (10 mL) gave, after purification *via* flash column chromatography (eluent 2:1 hexane:Et<sub>2</sub>O), **33** as a yellow oil (129 mg, 79%);  $[\alpha]_D^{23}$  -33.3 (*c* 1.2 in CHCl<sub>3</sub>);  $\nu_{\max}$  (film) 1643;  $\delta_H$  (400 MHz, CDCl<sub>3</sub>) 0.09 (3H, d, *J* 7.0, CH<sub>3</sub>CHCH<sub>3</sub>), 0.75 (3H, d, *J* 7.0, CH<sub>3</sub>CHCH<sub>3</sub>), 1.64-1.73 (1H, m, CH<sub>3</sub>CHCH<sub>3</sub>), 2.93 (1H, d, *J* 12.6, C(3)CH<sub>A</sub>H<sub>B</sub>Ph), 3.01 (1H, d, *J* 2.2, C(6)H), 3.22 (1H, d, *J* 12.6, C(3)CH<sub>C</sub>H<sub>D</sub>Ph), 3.47 (1H, d, *J* 12.6, C(3)CH<sub>C</sub>H<sub>D</sub>Ph), 3.56 (1H, d, *J* 12.6, C(3)CH<sub>A</sub>H<sub>B</sub>Ph), 3.78 (6H, app s, C(5)OMe, ArOMe), 3.97 (1H, d, *J* 14.8, NCHHAr), 4.84 (1H, d, *J* 14.8, NCHHAr), 6.52-6.54 (2H, m, Ar), 6.69-6.71 (2H, m, Ar), 7.17-7.35 (10H, m, Ph);  $\delta_C$  (100 MHz, CDCl<sub>3</sub>) 14.9, 20.4, 29.0, 46.8, 46.9, 47.9, 52.1, 55.1, 60.7, 66.6, 113.7, 126.4, 126.5, 127.8 (2C), 127.9, 129.3, 130.7, 131.4, 127.5, 137.3, 157.3, 158.7, 169.8; *m/z* (APCI<sup>+</sup>) 471 ([M+H]<sup>+</sup>, 100%); HRMS (ESI<sup>+</sup>) C<sub>30</sub>H<sub>35</sub>N<sub>2</sub>O<sub>3</sub> ([M+H]<sup>+</sup>) requires 471.2648; found 471.2646.

**(3S,6R)-3-iso-Propyl-6-benzyl-piperazine-2,5-dione 34**

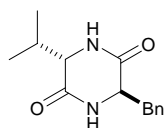

Following *General Procedure 3*, **26** (1.45 g, 3.81 mmol) and TFA (50 mL) gave **34** as an off white solid (676 mg, 72%); mp 256-257°C;  $[\alpha]_D^{23}$  -58.3 (*c* 1.0 in AcOH);  $\nu_{\max}$  (KBr) 3193, 1670;  $\delta_H$  (400 MHz, DMSO-*d*<sub>6</sub>) 0.75 (3H, d, *J* 6.8, CH<sub>3</sub>CHCH<sub>3</sub>), 0.82 (3H, d, *J* 7.1, CH<sub>3</sub>CHCH<sub>3</sub>), 1.99-2.08 (1H, m, CH<sub>3</sub>CHCH<sub>3</sub>), 2.87

(1H, dd, *J* 13.6, 4.9, C(6)CHHPH), 2.95 (1H, dd, *J* 2.5, 2.0, C(3)H), 3.15 (1H, dd, *J* 13.6, 3.8, C(6)CHHPH), 4.17 (1H, ddd, *J* 4.9, 3.8, 2.0, C(6)H), 7.18-7.28 (5H, m, *Ph*), 7.96 (1H, app br s, N(4)H), 8.15 (1H, app br s, N(1)H);  $\delta_c$  (100 MHz, DMSO-*d*<sub>6</sub>) 17.4, 19.0, 32.4, 38.8, 56.0, 59.8, 127.5, 128.8, 131.0, 136.9, 167.9, 168.2; *m/z* (ESI<sup>+</sup>) 247 ([M+H]<sup>+</sup>, 100%); HRMS (ESI<sup>+</sup>) C<sub>14</sub>H<sub>19</sub>N<sub>2</sub>O<sub>2</sub> ([M+H]<sup>+</sup>) requires 247.1447; found 247.1437.

**(R)-Phenylalanine methyl ester 38**

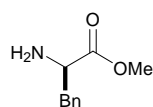

Following *General Procedure 4*, **34** (275 mg, 1.11 mmol) and conc HCl (30 mL) gave a mixture of amino acid hydrochloride salts **35** and **36** (447 mg);  $\delta_{\text{H}}$  (400 MHz, MeOD) 1.11 (6H, d,  $J$  7.2,  $\text{CH}_3\text{CHCH}_3$ ), 2.28-2.40 (1H, m,  $\text{CH}_3\text{CHCH}_3$ ), 3.23 (1H, dd,  $J$  14.5, 7.2,  $\text{CHHPh}$ ), 3.33 (1H, dd,  $J$  14.5, 5.8,  $\text{CHHPh}$ ), 3.89 (1H, d,  $J$  4.1,  $^i\text{PrCH}$ ), 4.29 (1H, app t,  $J$  6.5,  $\text{CHCH}_2\text{Ph}$ ), 7.31-7.41 (5H, m,  $\text{Ph}$ ). Subsequently, following *General Procedure 5*, the mixture of amino acid salts **35** and **36**,  $\text{SOCl}_2$  (0.28 mL, 2.26 mmol) and MeOH (40 mL) gave a mixture of methyl ester hydrochloride salts which was neutralized and distilled as outlined in *General Procedure 5*, to give **38** as a colourless oil (142 mg, 74%);  $[\alpha]_{\text{D}}^{23}$   $-32.2$  ( $c$  1.0 in EtOH) for **38.HCl**; {lit.<sup>2</sup>  $[\alpha]_{\text{D}}^{25}$   $-37.0$  ( $c$  2.0 in EtOH) for **38.HCl**};  $\nu_{\text{max}}$  (film) 3378, 1738;  $\delta_{\text{H}}$  (400 MHz,  $\text{CDCl}_3$ ) 1.51 (2H, br s,  $\text{NH}_2$ ), 2.84 (1H, dd,  $J$  13.6, 7.9,  $\text{CHHPh}$ ), 3.07 (1H, dd,  $J$  13.6, 5.1,  $\text{CHHPh}$ ), 3.68 (3H, s,  $\text{OMe}$ ), 3.71 (1H, m,  $\text{CH}$ ), 7.15-7.31 (5H, m,  $\text{Ph}$ );  $\delta_{\text{C}}$  (100 MHz,  $\text{CDCl}_3$ ) 41.1, 51.9, 55.8, 126.8, 128.5, 129.2, 137.2, 175.4;  $m/z$  ( $\text{ESI}^+$ ) 180 ( $[\text{M}+\text{H}]^+$ , 100%); HRMS ( $\text{ESI}^+$ )  $\text{C}_{10}\text{H}_{14}\text{NO}_2$  ( $[\text{M}+\text{H}]^+$ ) requires 180.1025; found 180.1020.

**(S)-N(1)-Methyl-3-iso-propyl-piperazine-2,5-dione 45**

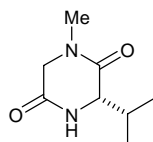

CAN (8.61 g, 15.7 mmol) was added to (*S*)-*N*(1)-methyl-*N*(4)-*p*-methoxybenzyl-3-*iso*-propyl-diketopiperazin-2,5-dione (1.52 g, 5.23 mmol) in a solution of MeCN/ $\text{H}_2\text{O}$  (3:1, 160 mL) and stirred at rt for 16 h. The reaction was then quenched with sat aq  $\text{K}_2\text{CO}_3$ .  $\text{H}_2\text{O}$  (100 mL) was then added followed by an organic wash with  $\text{Et}_2\text{O}$ . The product was extracted from the organic layer with two portions of  $\text{H}_2\text{O}$ . The aqueous layers were combined and concentrated *in vacuo*. Trituration with DCM followed by concentration of the organic solution *in vacuo* gave **45** (513 g, 58%) as a white crystalline solid; Found C, 56.3; H, 8.3; N, 16.5.  $\text{C}_8\text{H}_{14}\text{N}_2\text{O}_2$  requires C, 56.5; H, 8.3; N, 16.5%; mp 135-136°C;  $[\alpha]_{\text{D}}^{23}$   $-3.6$  ( $c$  0.9 in  $\text{CHCl}_3$ );  $\nu_{\text{max}}$  (KBr) 3392, 1683, 1651;  $\delta_{\text{H}}$  (400 MHz,  $\text{CDCl}_3$ ) 0.86 (3H, d,  $J$  7.1,  $\text{CH}_3\text{CHCH}_3$ ), 1.00 (3H, d,  $J$  6.8,  $\text{CH}_3\text{CHCH}_3$ ), 2.33-2.40 (1H, m,  $\text{CH}_3\text{CHCH}_3$ ), 2.95 (3H, s,  $\text{NMe}$ ), 3.85 (1H, d,  $J$  17.9,  $\text{C(6)HH}$ ), 3.86 (1H, d,  $J$  3.0,  $\text{C(3)H}$ ), 4.01 (1H, d,  $J$  17.9,  $\text{C(6)HH}$ ), 7.80 (1H, app br s,  $\text{NH}$ );  $\delta_{\text{C}}$  (100 MHz,  $\text{CDCl}_3$ ) 16.2, 18.7, 33.1, 33.7, 51.3,

<sup>2</sup> S.-T. Chen, K.-T. Wang and C.-H. Wong, *J. Chem. Soc., Chem. Commun.*, **1986**, 1514.

60.6, 165.8, 166.3;  $m/z$  (ESI<sup>-</sup>) 169 ([M-H]<sup>-</sup>, 100%); HRMS (ESI<sup>-</sup>) C<sub>8</sub>H<sub>13</sub>N<sub>2</sub>O<sub>2</sub> ([M-H]<sup>-</sup>) requires 169.0977; found 169.0966.

**(S)-N(1)-Methyl-3-iso-propyl-5-methoxy-3,6-dihydropyrazine-2-one 47**

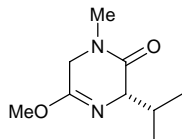

Following *General Procedure 1*, **45** (492 mg, 2.89 mmol), Me<sub>3</sub>OBF<sub>4</sub> (860 mg, 5.78 mmol) and BmimBF<sub>4</sub> (10 mL) gave **47** as a colourless oil (442 mg, 83%);  $[\alpha]_D^{23}$  -19.5 (*c* 1.0 in CHCl<sub>3</sub>);  $\nu_{\max}$  (film) 1711, 1651;  $\delta_H$  (400 MHz, CDCl<sub>3</sub>) 0.74 (3H, d, *J* 6.8, CH<sub>3</sub>CHCH<sub>3</sub>), 1.08 (3H, d, *J* 6.8, CH<sub>3</sub>CHCH<sub>3</sub>), 2.40-2.48 (1H, m, CH<sub>3</sub>CHCH<sub>3</sub>), 2.96 (3H, s, NMe), 3.73 (3H, s, OMe), 3.83 (1H, dd, *J* 16.9, 2.5, C(6)HH), 3.86 (1H, dd, *J* 16.9, 2.3, C(6)HH), 4.01 (1H, ddd, *J* 3.3, 2.5, 2.3, C(3)H);  $\delta_C$  (100 MHz, CDCl<sub>3</sub>) 16.6, 17.9, 33.0, 33.4, 48.3, 52.7, 63.9, 156.5, 169.1;  $m/z$  (ESI<sup>+</sup>) 207 ([M+Na]<sup>+</sup>, 40%), 185 (100); HRMS (ESI<sup>+</sup>) C<sub>9</sub>H<sub>17</sub>N<sub>2</sub>O<sub>2</sub> ([M+H]<sup>+</sup>) requires 185.1290; found 185.1284.

**(S)-N(1)-p-Methoxybenzyl-3-iso-propyl-5-methoxy-3,6-dihydro-pyrazine-2-one 48**

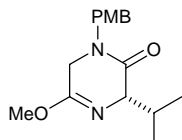

Following *General Procedure 1*, **46** (425 mg, 1.53 mmol), Me<sub>3</sub>OBF<sub>4</sub> (455 mg, 3.07 mmol) and BmimBF<sub>4</sub> (5 mL) gave, after flash column chromatography (eluent Et<sub>2</sub>O), **48** as a white crystalline solid (275 mg, 62%); C<sub>16</sub>H<sub>22</sub>N<sub>2</sub>O<sub>3</sub> requires C, 66.2; H, 7.6; N, 9.7%; found C, 66.3; H, 7.6; N, 9.5%; mp 67-68°C (DCM-heptane);  $[\alpha]_D^{24}$  +1.6 (*c* 1.1 in CHCl<sub>3</sub>);  $\nu_{\max}$  (KBr) 1640;  $\delta_H$  (400 MHz, C<sub>6</sub>D<sub>6</sub>) 0.92 (3H, d, *J* 7.2, CH<sub>3</sub>CHCH<sub>3</sub>), 1.24 (3H, d, *J* 6.9, CH<sub>3</sub>CHCH<sub>3</sub>), 2.81-2.88 (1H, m, CH<sub>3</sub>CHCH<sub>3</sub>), 3.42 (3H, s, C(5)OMe), 3.46 (1H, dd, *J* 17.1, 2.8, C(6)HH), 3.55 (3H, s, ArOMe), 3.58 (1H, dd, *J* 17.1, 2.8, C(6)HH), 4.13 (1H, d, *J* 14.3, NCHHAr), 4.21 (1H, app dd, *J* 5.8, 2.8, C(3)H), 4.76 (1H, d, *J* 14.3, NCHHAr), 6.80 (2H, m, Ar), 7.19 (2H, m, Ar);  $\delta_C$  (100 MHz, CDCl<sub>3</sub>) 16.6, 19.5, 33.0, 45.2, 48.5, 52.6, 55.1, 64.1, 114.1, 127.8, 129.8, 156.9, 159.3, 168.6;  $m/z$  (APCI<sup>+</sup>) 291 ([M+H]<sup>+</sup>, 100%); HRMS (ESI<sup>+</sup>) C<sub>16</sub>H<sub>23</sub>N<sub>2</sub>O<sub>3</sub> ([M+H]<sup>+</sup>) requires 291.1709; found 291.1707.

**(RS)-N(1),3-Dimethyl-3-iso-propyl-5-methoxy-3,6-dihydropyrazine-2-one 49**

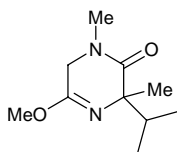

Following *General Procedure 2*, BuLi (1.6 M in hexanes, 0.41 mL, 0.63 mmol), **47** (105 mg, 0.57 mmol), THF (10 mL) and MeI (40  $\mu$ L, 0.57 mmol) gave, after flash column chromatography (eluent 1:1 pentane:Et<sub>2</sub>O), **49** as a colourless oil (81 mg, 72%);  $[\alpha]_D^{23}$  -1.22 (*c* 0.6 in CHCl<sub>3</sub>);  $\nu_{\max}$  (film) 1708, 1652;  $\delta_{\text{H}}$  (400 MHz, CDCl<sub>3</sub>) 0.72 (3H, d, *J* 6.8, CH<sub>3</sub>CHCH<sub>3</sub>), 0.96 (3H, d, *J* 7.2, CH<sub>3</sub>CHCH<sub>3</sub>), 1.34 (3H, s, C(3)Me), 2.19-2.29 (1H, m, CH<sub>3</sub>CHCH<sub>3</sub>), 2.95 (3H, s, NMe), 3.70 (3H, s, OMe), 3.89 (2H, app s, C(6)H<sub>2</sub>);  $\delta_{\text{C}}$  (100 MHz, CDCl<sub>3</sub>) 15.7, 18.1, 26.0, 33.5, 36.8, 48.4, 52.5, 63.3, 154.5, 169.3; *m/z* (ESI<sup>+</sup>) 199 ([M+H]<sup>+</sup>, 100%); HRMS (ESI<sup>+</sup>) C<sub>10</sub>H<sub>19</sub>N<sub>2</sub>O<sub>2</sub> ([M+H]<sup>+</sup>) requires 199.1447; found 199.1452.

**(RS)-N(1)-Methyl-3-benzyl-3-iso-propyl-5-methoxy-3,6-dihydropyrazine-2-one 50**

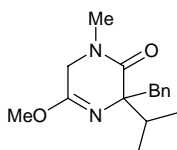

Following *General Procedure 2*, BuLi (1.6 M in hexanes, 0.53 mL, 0.82 mmol), **47** (150 mg, 0.82 mmol), THF (10 mL) and BnBr (0.11 mL, 0.90 mmol) gave, after flash column chromatography (eluent 2:1 40-60° petrol:Et<sub>2</sub>O), **50** (143 mg, 64%) as a colourless oil;  $[\alpha]_D^{23}$  -0.21 (*c* 0.9 in CHCl<sub>3</sub>);  $\nu_{\max}$  (film) 1708, 1654;  $\delta_{\text{H}}$  (400 MHz, CDCl<sub>3</sub>) 0.74 (3H, d, *J* 6.8, CH<sub>3</sub>CHCH<sub>3</sub>), 1.10 (3H, d, *J* 6.8, CH<sub>3</sub>CHCH<sub>3</sub>), 2.43 (1H, d, *J* 16.5, C(6)HH), 2.49-2.59 (1H, m, CH<sub>3</sub>CHCH<sub>3</sub>), 2.63 (3H, s, NMe), 2.87 (1H, d, *J* 12.4, C(3)CHHPh), 3.09 (1H, d, *J* 12.4, C(3)CHHPh), 3.34 (1H, d, *J* 16.5, C(6)HH), 3.74 (3H, s, OMe), 7.02-7.06 (2H, m, Ph), 7.14-7.21 (3H, m, Ph);  $\delta_{\text{C}}$  (100 MHz, CDCl<sub>3</sub>) 15.9, 18.8, 33.0, 35.4, 44.5, 47.7, 52.5, 62.8, 126.4, 127.6, 130.4, 137.4, 156.0, 170.8; *m/z* (ESI<sup>+</sup>) 275 ([M+H]<sup>+</sup>, 100%); HRMS (ESI<sup>+</sup>) C<sub>16</sub>H<sub>23</sub>N<sub>2</sub>O<sub>2</sub> ([M+H]<sup>+</sup>) requires 275.1760; found 275.1763.

**(RS)-N(1)-p-Methoxybenzyl-3-methyl-3-iso-propyl-5-methoxy-3,6-dihydropyrazine-2-one 51**

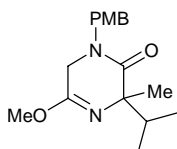



Following *General Procedure 2*, BuLi (1.6 M in hexanes, 0.33 mL, 0.52 mmol), **48** (138 mg, 0.475 mmol), THF (10 mL) and MeI (33  $\mu$ L, 0.52 mmol) gave, after flash column chromatography (eluent 2:1 40-60° petrol:Et<sub>2</sub>O), **51** (117 mg, 81%) as a colourless oil;  $[\alpha]_D^{22} +0.7$  (*c* 1.1 in CHCl<sub>3</sub>);  $\nu_{\max}$  (film) 1650;  $\delta_{\text{H}}$  (400 MHz, CDCl<sub>3</sub>) 0.71 (3H, d, *J* 6.6, CH<sub>3</sub>CHCH<sub>3</sub>), 0.96 (3H, d, *J* 6.6, CH<sub>3</sub>CHCH<sub>3</sub>), 1.37 (3H, s, C(3)*Me*), 2.25-2.35 (1H, m, CH<sub>3</sub>CHCH<sub>3</sub>), 3.65 (3H, s, C(5)*OMe*), 3.73 (2H, app s, C(6)*H*<sub>2</sub>), 3.78 (3H, s, Ar*OMe*), 4.42 (1H, d, *J* 14.1, NCHHAr), 4.64 (1H, d, *J* 14.1, NCHHAr), 6.82-6.87 (2H, m, Ar), 7.17-7.22 (2H, m, Ar);  $\delta_{\text{C}}$  (100 MHz, CDCl<sub>3</sub>) 15.8, 18.1, 26.1, 36.7, 45.3, 48.6, 52.5, 55.2, 63.4, 114.0, 128.1, 129.8, 154.9, 159.2, 172.1; *m/z* (APCI<sup>+</sup>) 305 ([M+H]<sup>+</sup>, 50%); HRMS (ESI<sup>+</sup>) C<sub>17</sub>H<sub>25</sub>N<sub>2</sub>O<sub>3</sub> ([M+H]<sup>+</sup>) requires 305.1865; found 305.1864.

**(*RS*)-*N*(1)-*p*-Methoxybenzyl-3-benzyl-3-*iso*-propyl-5-methoxy-3,6-dihydropyrazine-2-one **52****

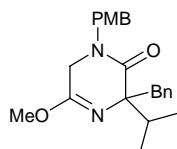

Following *General Procedure 2*, BuLi (0.13 mL, 1.6 M, 0.21 mmol), **48** (56 mg, 0.193 mmol), THF (10 mL) and BnBr (25  $\mu$ L, 0.21 mmol) gave, after flash column chromatography (eluent 3:1 40-60° petrol:EtOAc), **52** (47 mg, 64%) as a yellow oil;  $[\alpha]_D^{22} -2.5$  (*c* 0.9 in CHCl<sub>3</sub>);  $\nu_{\max}$  (film) 1651;  $\delta_{\text{H}}$  (400 MHz, CDCl<sub>3</sub>) 0.79 (3H, d, *J* 6.7, CH<sub>3</sub>CHCH<sub>3</sub>), 1.12 (3H, d, *J* 6.7, CH<sub>3</sub>CHCH<sub>3</sub>), 2.53-2.63 (1H, m, CH<sub>3</sub>CHCH<sub>3</sub>), 2.56 (1H, d, *J* 16.7, C(6)*HH*), 2.95 (1H, d, *J* 12.2, C(3)*CHHPh*), 3.18 (1H, d, *J* 12.2, C(3)*CHHPh*), 3.30 (1H, d, *J* 16.7, C(6)*HH*), 3.72 (3H, s, C(5)*OMe*), 3.77 (3H, s, Ar*OMe*), 4.00 (1H, d, *J* 14.9, NCHHAr), 4.56 (1H, d, *J* 14.9, NCHHAr), 6.74-6.79 (2H, m, Ar), 6.88-6.94 (2H, m, Ar), 7.05-7.22 (5H, m, *Ph*);  $\delta_{\text{C}}$  (100 MHz, CDCl<sub>3</sub>) 16.0, 18.7, 36.3, 44.4, 44.7, 48.2, 52.5, 55.2, 68.4, 113.9, 126.3, 127.6, 129.5, 130.9, 127.8, 137.5, 156.1, 159.0, 170.2; *m/z* (APCI<sup>+</sup>) 381 ([M+H]<sup>+</sup>, 100%); HRMS (ESI<sup>+</sup>) C<sub>23</sub>H<sub>29</sub>N<sub>2</sub>O<sub>3</sub> ([M+H]<sup>+</sup>) requires 381.2178; found 381.2176.

**(*3R,6S*)-*N*(1),3-Dimethyl-3-benzyl-5-methoxy-6-*iso*-propyl-3,6-dihydropyrazine-2-one **53****

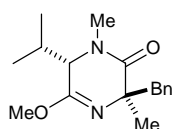

Following *General Procedure 2*, BuLi (1.6 M in hexanes, 0.44 mL, 0.70 mmol), **20** (138 mg, 0.70 mmol), THF (10 mL) and BnBr (91  $\mu$ L, 0.77 mmol) gave a 99:1 mixture of **53:54**. Purification *via* flash column chromatography (eluent 1:1 40-60° petrol:Et<sub>2</sub>O) gave **53** as a colourless oil (155 mg, 81%, >98% de);  $[\alpha]_D^{23}$

+75.0 (*c* 1.15 in CHCl<sub>3</sub>);  $\nu_{\max}$  (film) 1699, 1650;  $\delta_{\text{H}}$  (400 MHz, CDCl<sub>3</sub>) 0.76 (3H, d, *J* 7.0, CH<sub>3</sub>CHCH<sub>3</sub>), 0.94 (3H, d, *J* 7.0, CH<sub>3</sub>CHCH<sub>3</sub>), 1.53 (3H, s, C(3)Me), 1.92-2.03 (1H, m, CH<sub>3</sub>CHCH<sub>3</sub>), 2.66 (3H, s, NMe), 2.75 (1H, d, *J* 12.4, C(3)CHHPH), 3.19 (1H, d, *J* 2.5, C(6)H), 3.30 (1H, d, *J* 12.4, C(3)CHHPH), 3.66 (3H, s, OMe), 7.05-7.17 (5H, m, Ph);  $\delta_{\text{C}}$  (100 MHz, CDCl<sub>3</sub>) 17.2, 19.5, 28.3, 30.2, 33.2, 48.8, 52.1, 62.0, 64.7, 126.2, 127.3, 130.2, 137.4, 155.9, 171.4; *m/z* (ESI<sup>+</sup>) 289 ([M+H]<sup>+</sup>, 100%); HRMS (ESI<sup>+</sup>) C<sub>17</sub>H<sub>25</sub>N<sub>2</sub>O<sub>2</sub> ([M+H]<sup>+</sup>) requires 289.1916; found 289.1918.

**(3*S*,6*S*)-*N*(1),3-Dimethyl-3-benzyl-5-methoxy-6-*iso*-propyl-3,6-dihydropyrazine-2-one 54**

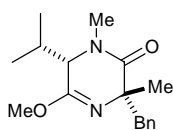

Following *General Procedure 2*, BuLi (1.6 M in hexanes, 0.28 mL, 0.44 mmol), **24** (121 mg, 0.44 mmol), THF (10 mL) and MeI (30  $\mu$ L, 0.49 mmol) gave a 3.5:96.5 mixture of **53**:**54**. Purification *via* flash column chromatography (eluent 1:1 40-60° petrol:Et<sub>2</sub>O) gave **54** as a colourless oil (63 mg, 50%, >98% de);  $[\alpha]_D^{23} +77.8$  (*c* 2.8 in CHCl<sub>3</sub>);  $\nu_{\max}$  (film) 1696, 1637;  $\delta_H$  (400 MHz, CDCl<sub>3</sub>) 0.33 (3H, d, *J* 7.1, CH<sub>3</sub>CHCH<sub>3</sub>), 0.87 (3H, d, *J* 7.1, CH<sub>3</sub>CHCH<sub>3</sub>), 1.40 (3H, s, C(3)Me), 1.80-1.91 (1H, m, CH<sub>3</sub>CHCH<sub>3</sub>), 2.88 (3H, s, NMe), 2.95 (1H, d, *J* 12.0, C(3)CHHPH), 3.27 (1H, d, *J* 12.0, C(3)CHHPH), 3.66 (3H, s, OMe), 3.73 (1H, d, *J* 3.0, C(6)H), 7.12-7.22 (5H, m, Ph);  $\delta_C$  (100 MHz, CDCl<sub>3</sub>) 16.3, 19.8, 30.2, 30.5, 33.9, 46.5, 52.1, 61.7, 64.9, 126.3, 127.7, 131.1, 137.6, 155.7, 172.2; *m/z* (ESI<sup>+</sup>) 289 ([M+H]<sup>+</sup>, 100%); HRMS (ESI<sup>+</sup>) C<sub>17</sub>H<sub>25</sub>N<sub>2</sub>O<sub>2</sub> ([M+H]<sup>+</sup>) requires 289.1916; found 289.1920.

**(3*R*,6*S*)-*N*(1),3-Dimethyl-3,6-di-*iso*-propyl-5-methoxy-3,6-dihydro-pyrazine-2-one 55**

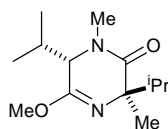

Following *General Procedure 2*, BuLi (2.5 M in hexanes, 1.11 mL, 2.78 mmol), **20** (551 mg, 2.78 mmol), THF (20 mL) and <sup>1</sup>PrI (0.31 mL, 3.06 mmol) gave a >99:<1 mixture of **55**:**56**. Purification *via* flash column chromatography (eluent 1:1 30-40° petrol:Et<sub>2</sub>O) gave **55** as a colourless oil (548 mg, 82%, >98% de);  $[\alpha]_D^{22} +135.1$  (*c* 1.0 in CHCl<sub>3</sub>);  $\nu_{\max}$  (film) 1704, 1650;  $\delta_H$  (400 MHz, CDCl<sub>3</sub>) 0.60 (3H, d, *J* 6.8, C(3)CHMeMe), 0.86 (3H, d, *J* 6.8, C(6)CHMeMe), 0.95 (3H, d, *J* 6.8, C(3)CHMeMe), 1.07 (3H, d, *J* 7.2, C(6)CHMeMe), 1.35 (3H, s, C(3)Me), 2.10-2.20 (1H, m, C(6)CHMe<sub>2</sub>), 2.20-2.29 (1H, m, C(3)CHMe<sub>2</sub>), 2.90 (3H, s, NMe), 3.65 (3H, s, OMe), 3.80 (1H, d, *J* 2.7, C(6)H);  $\delta_C$  (100 MHz, CDCl<sub>3</sub>) 15.5, 17.4, 17.8, 19.7, 26.0, 30.4, 33.2, 37.2, 51.9, 62.3, 64.8, 155.8, 173.3; *m/z* (ESI<sup>+</sup>) 253 ([M+Na]<sup>+</sup>, 100%); HRMS (ESI<sup>+</sup>) C<sub>13</sub>H<sub>25</sub>N<sub>2</sub>O<sub>2</sub> ([M+H]<sup>+</sup>) requires 241.1916; found 241.1917.

**(3*S*,6*S*)-*N*(1),3-Dimethyl-3,6-di-*iso*-propyl-5-methoxy-3,6-dihydropyrazine-2-one 56**

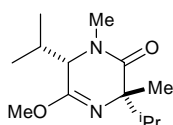

Following *General Procedure 2*, BuLi (2.5 M in hexanes, 0.86 mL, 2.18 mmol), **28** (492 mg, 2.18 mmol), THF (20 mL) and MeI (0.13 mL, 2.40 mmol) gave a 1:99 mixture of **55**:**56**. Purification *via* flash column chromatography (eluent 1:1 30-40° petrol:Et<sub>2</sub>O) gave **56** as a pale yellow oil (471 mg, 90%, >98% de);  $[\alpha]_D^{22}$  +102.4 (*c* 1.0 in CHCl<sub>3</sub>);  $\nu_{\max}$  (film) 1701, 1644;  $\delta_{\text{H}}$  (400 MHz, CDCl<sub>3</sub>) 0.73 (3H, d, *J* 6.8, C(3)CHMeMe), 0.82 (3H, d, *J* 6.8, C(6)CHMeMe), 0.93 (3H, d, *J* 6.8, C(3)CHMeMe), 1.06 (3H, d, *J* 7.2, C(6)CHMeMe), 1.29 (3H, s, C(3)Me) 2.10-2.21 (2H, m, 2 × CHMe<sub>2</sub>), 2.87 (3H, s, NMe), 3.58 (3H, s, OMe), 3.77 (1H, d, *J* 2.7, C(6)H);  $\delta_{\text{C}}$  (100 MHz, CDCl<sub>3</sub>) 16.2, 17.4, 19.1, 20.3, 27.2, 30.5, 33.7, 35.5, 51.8, 62.6, 64.7, 155.6, 173.2; *m/z* (ESI<sup>+</sup>) 263 ([M+Na]<sup>+</sup>, 70%), 241 (100); HRMS (ESI<sup>+</sup>) C<sub>13</sub>H<sub>25</sub>N<sub>2</sub>O<sub>2</sub> ([M+H]<sup>+</sup>) requires 241.1916; found 241.1908.

**(3R,6S)-N(1)-Methyl-3-benzyl-3,6-di-iso-propyl-5-methoxy-3,6-dihydropyrazine-2-one 57**

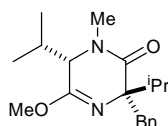

Following *General Procedure 2*, BuLi (2.5 M in hexanes, 0.89 mL, 2.23 mmol), **24** (610 mg, 2.23 mmol), THF (20 mL) and <sup>i</sup>PrI (0.22 mL, 2.45 mmol) gave a >99:<1 mixture of **57**:**58**. Purification *via* flash column chromatography (eluent 3:2 30-40° petrol:Et<sub>2</sub>O) gave **57** as a colourless oil (660 mg, 94%, >98% de);  $[\alpha]_D^{22}$  +106.9 (*c* 1.0 in CHCl<sub>3</sub>);  $\nu_{\max}$  (film) 1698, 1644;  $\delta_{\text{H}}$  (400 MHz, CDCl<sub>3</sub>) -0.07 (3H, d, *J* 7.2, C(6)CHMeMe), 0.71 (3H, d, *J* 6.8, C(3)CHMeMe), 0.74 (3H, d, *J* 7.2, C(6)CHMeMe), 1.03 (3H, d, *J* 6.8, C(3)CHMeMe), 1.65-1.73 (1H, m, C(6)CHMe<sub>2</sub>), 2.25-2.35 (1H, m, C(3)CHMe<sub>2</sub>), 2.81 (3H, s, NMe), 2.96 (1H, d, *J* 12.3, C(3)CHPh), 3.35 (1H, d, *J* 12.3, C(3)CHPh), 3.61 (1H, d, *J* 2.4, C(6)H), 3.71 (3H, s, OMe), 7.06-7.19 (5H, m, Ph);  $\delta_{\text{C}}$  (100 MHz, CDCl<sub>3</sub>) 15.2, 16.2, 17.7, 19.5, 30.1, 33.1, 38.9, 43.0, 51.9, 64.3, 67.6, 126.0, 127.6, 131.1, 138.1, 156.5, 170.9; *m/z* (ESI<sup>+</sup>) 317 ([M+H]<sup>+</sup>, 100%); HRMS (ESI<sup>+</sup>) C<sub>19</sub>H<sub>29</sub>N<sub>2</sub>O<sub>2</sub> ([M+H]<sup>+</sup>) requires 317.2229; found 317.2235.

**(3S,6S)-N(1)-Methyl-3-benzyl-3,6-di-iso-propyl-5-methoxy-3,6-dihydropyrazine-2-one 58**

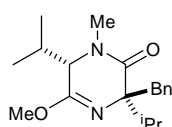

Following *General Procedure 2*, BuLi (2.5 M in hexanes, 1.00 mL, 2.51 mmol), **28** (568 mg, 2.51 mmol), THF (20 mL) and benzylbromide (0.30 mL, 2.76 mmol) gave a <1:>99 mixture of **57**:**58**. Purification *via*

flash column chromatography (eluent 1:1 30-40° petrol:Et<sub>2</sub>O) gave **58** as a colourless oil (592 mg, 75%, >98% de);  $[\alpha]_D^{22} +26.6$  (*c* 1.0 in CHCl<sub>3</sub>);  $\nu_{\max}$  (film) 1704, 1651;  $\delta_{\text{H}}$  (400 MHz, CDCl<sub>3</sub>) 0.74 (3H, d, *J* 6.8, C(6)CHMeMe), 0.81 (3H, d, *J* 6.8, C(3)CHMeMe), 0.95 (3H, d, *J* 7.2, C(6)CHMeMe), 1.12 (3H, d, *J* 6.8, C(3)CHMeMe), 1.91-2.02 (1H, m, C(6)CHMe<sub>2</sub>), 2.50-2.58 (1H, m, C(3)CHMe<sub>2</sub>), 2.54 (3H, s, NMe), 2.60 (1H, d, *J* 2.0, C(6)H), 2.87 (1H, d, *J* 12.3, C(3)CHHPh), 3.02 (1H, d, *J* 12.3, C(3)CHHPh), 3.74 (3H, s, OMe), 6.98-7.02 (2H, m, Ph), 7.17-7.21 (3H, m, Ph);  $\delta_{\text{C}}$  (100 MHz, CDCl<sub>3</sub>) 15.9, 16.6, 19.7, 19.9, 29.7, 32.8, 34.9, 45.8, 51.8, 63.7, 67.8, 126.2, 127.3, 130.1, 137.3, 156.9, 170.9; *m/z* (ESI<sup>+</sup>) 317 ([M+H]<sup>+</sup>, 100%); HRMS (ESI<sup>+</sup>) C<sub>19</sub>H<sub>29</sub>N<sub>2</sub>O<sub>2</sub> ([M+H]<sup>+</sup>) requires 317.2229; found 317.2225.

**(3R,6S)-N(1)-p-Methoxybenzyl-3-benzyl-3-methyl-5-methoxy-6-iso-propyl-3,6-dihydropyrazine-2-one**

**59**

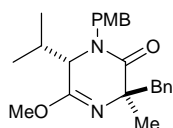

Following *General Procedure 2*, BuLi (2.5 M in hexanes, 0.21 mL, 0.53 mmol), **22** (162 mg, 0.53 mmol), THF (10 mL) and BnBr (70  $\mu$ L, 0.59 mmol) gave a 99:1 mixture of **59:60**. Purification *via* flash column chromatography (eluent 3:1 hexane:Et<sub>2</sub>O) gave **59** as a colourless oil (164 mg, 78%, >98% de); C<sub>24</sub>H<sub>30</sub>N<sub>2</sub>O<sub>3</sub> requires C, 73.1; H, 7.7; N, 7.1%; found C, 72.9; H, 7.7; N, 7.1%;  $[\alpha]_D^{22} -53.1$  (*c* 1.3 in CHCl<sub>3</sub>);  $\nu_{\max}$  (film) 1651;  $\delta_{\text{H}}$  (400 MHz, CDCl<sub>3</sub>) 0.81 (3H, d, *J* 6.8, CH<sub>3</sub>CHCH<sub>3</sub>), 0.89 (3H, d, *J* 6.8, CH<sub>3</sub>CHCH<sub>3</sub>), 1.63 (3H, s, C(3)Me), 1.98-2.09 (1H, m, CH<sub>3</sub>CHCH<sub>3</sub>), 2.90 (1H, d, *J* 12.7, C(3)CHHPh), 3.26 (1H, d, *J* 2.8, C(6)H), 3.42 (1H, d, *J* 12.7, C(3)CHHPh), 3.63 (1H, d, *J* 15.0, NCHHAr), 3.70 (3H, s, C(5)OMe), 3.75 (3H, s, ArOMe), 5.38 (1H, d, *J* 15.0, NCHHAr), 6.44-6.47 (2H, m, Ar), 6.64-6.67 (2H, m, Ar), 7.20-7.28 (5H, m, Ph);  $\delta_{\text{C}}$  (100 MHz, CDCl<sub>3</sub>) 17.1, 20.1, 28.9, 29.4, 45.1, 48.7, 52.1, 55.1, 59.6, 62.4, 113.9, 126.2, 126.9, 127.8, 129.4, 130.8, 137.7, 156.5, 158.8, 171.0; *m/z* (ESI<sup>+</sup>) 395 ([M+H]<sup>+</sup>, 100%); HRMS (ESI<sup>+</sup>) C<sub>24</sub>H<sub>31</sub>N<sub>2</sub>O<sub>3</sub> ([M+H]<sup>+</sup>) requires 395.2335; found 395.2328.

**(3S,6S)-N(1)-p-Methoxybenzyl-3-benzyl-3-methyl-5-methoxy-6-iso-propyl-3,6-dihydropyrazine-2-one**

**60**

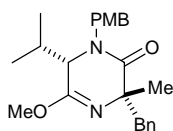

Following *General Procedure 2*, BuLi (1.6 M in hexanes, 0.28 mL, 0.45 mmol), **26** (158 mg, 0.45 mmol), THF (10 mL) and MeI (28  $\mu$ L, 0.45 mmol) gave a 2:98 mixture of **59:60**. Purification *via* flash column chromatography (eluent 3:1 hexane:Et<sub>2</sub>O) gave **60** as a colourless oil (112 mg, 68%, >98% de);  $[\alpha]_D^{23}$  -17.0 (*c* 0.95 in CHCl<sub>3</sub>);  $\nu_{\max}$  (film) 1644;  $\delta_{\text{H}}$  (400 MHz, CDCl<sub>3</sub>) 0.26 (3H, d, *J* 6.8, CH<sub>3</sub>CHCH<sub>3</sub>), 0.89 (3H, d, *J* 6.8, CH<sub>3</sub>CHCH<sub>3</sub>), 1.43 (3H, s, C(3)Me), 1.85-1.95 (1H, m, CH<sub>3</sub>CHCH<sub>3</sub>), 3.02 (1H, d, *J* 12.9, C(3)CHHPh), 3.35 (1H, d, *J* 12.9, C(3)CHHPh), 3.63 (3H, s, C(5)OMe), 3.64 (1H, d, *J* 3.2, C(6)H), 3.80 (3H, s, ArOCH<sub>3</sub>), 3.83 (1H, d, *J* 14.0, NCHHAr), 5.41 (1H, d, *J* 14.0, NCHHAr), 6.82-6.88 (2H, m, Ar), 7.08-7.16 (2H, m, Ar), 7.18-7.27 (5H, m, Ph);  $\delta_{\text{C}}$  (100 MHz, CDCl<sub>3</sub>) 15.8, 20.4, 29.7, 30.8, 46.2, 46.4, 52.0, 55.2, 60.7, 61.9, 114.1, 126.4, 127.7, 129.4, 131.2, 128.3, 137.6, 155.9, 159.0, 172.1; *m/z* (ESI<sup>+</sup>) 417 ([M+Na]<sup>+</sup>, 100%), 395 (35); HRMS (ESI<sup>+</sup>) C<sub>24</sub>H<sub>31</sub>N<sub>2</sub>O<sub>3</sub> ([M+H]<sup>+</sup>) requires 395.2335; found 395.2333.

**(3*R*,6*S*)-N(1)-*p*-Methoxybenzyl-3,6-di-*iso*-propyl-3-methyl-5-methoxy-3,6-dihydropyrazine-2-one 61**

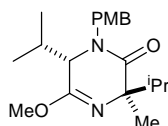

Following *General Procedure 2*, BuLi (2.5 M in hexanes, 0.15 mL, 0.37 mmol), **22** (114 mg, 0.37 mmol), THF (10 mL) and <sup>1</sup>PrI (40  $\mu$ L, 0.41 mmol) gave a 99:1 mixture of **61:62**. Purification *via* flash column chromatography (eluent 3:1 30-40° petrol:Et<sub>2</sub>O) gave **61** as a colourless oil (93 mg, 72%, >98% de);  $[\alpha]_D^{23}$  -14.3 (*c* 1.0 in CHCl<sub>3</sub>);  $\nu_{\max}$  (film) 1705, 1646;  $\delta_{\text{H}}$  (400 MHz, CDCl<sub>3</sub>) 0.62 (3H, d, *J* 6.6, C(3)CHMeMe), 0.85 (3H, d, *J* 6.8, C(6)CHMeMe), 0.97 (3H, d, *J* 6.8, C(3)CHMeMe), 1.03 (3H, d, *J* 7.1, C(6)CHMeMe), 1.41 (3H, s, C(3)Me), 2.14-2.25 (1H, m, C(6)CHMe<sub>2</sub>), 2.25-2.38 (1H, m, C(3)CHMe<sub>2</sub>), 3.61 (3H, s, C(5)OMe), 3.71 (1H, d, *J* 2.5, C(6)H), 3.79 (3H, s, ArOMe), 3.80 (1H, d, *J* 14.7, NCHHAr), 5.49 (1H, d, *J* 14.7, NCHHAr), 6.83-6.87 (2H, m, Ar), 7.14-7.19 (2H, m, Ar);  $\delta_{\text{C}}$  (100 MHz, CDCl<sub>3</sub>) 15.8, 17.2, 18.1, 20.4, 26.5, 30.1, 37.3, 45.6, 51.9, 55.2, 60.2, 62.4, 114.0, 128.0, 130.1, 156.1, 159.1, 173.1; *m/z* (ESI<sup>+</sup>) 347 ([M+H]<sup>+</sup>, 100%); HRMS (ESI<sup>+</sup>) C<sub>20</sub>H<sub>31</sub>N<sub>2</sub>O<sub>3</sub> ([M+H]<sup>+</sup>) requires 347.2335; found 347.2343.

**(3*S*,6*S*)-N(1)-*p*-Methoxybenzyl-3,6-di-*iso*-propyl-3-methyl-5-methoxy-3,6-dihydropyrazine-2-one 62**

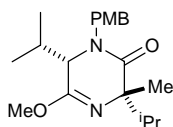

Following *General Procedure 2*, BuLi (2.5 M in hexanes, 1.08 mL, 2.70 mmol), **30** (900 mg, 2.70 mmol), THF (50 mL) and MeI (0.19 mL, 2.97 mmol) gave a 7.5:92.5 mixture of **61:62**. Purification *via* flash column chromatography (eluent 3:1 40-60° petrol:Et<sub>2</sub>O) gave **62** as a colourless oil (870 mg, 93%, >98% de);  $[\alpha]_D^{23}$  -15.8 (*c* 1.15 in CHCl<sub>3</sub>);  $\nu_{\max}$  (film) 1704, 1644;  $\delta_{\text{H}}$  (400 MHz, CDCl<sub>3</sub>) 0.83 (3H, d, *J* 6.6, C(3)CHMeMe), 0.83 (3H, d, *J* 6.8, C(6)CHMeMe), 1.01 (3H, d, *J* 6.8, C(3)CHMeMe), 1.04 (3H, d, *J* 7.1, C(6)CHMeMe), 1.28 (3H, s, C(3)Me), 2.15-2.25 (1H, m, C(6)CHMe<sub>2</sub>), 2.25-2.35 (1H, m, C(3)CHMe<sub>2</sub>), 3.58 (3H, s, C(5)OMe), 3.70 (1H, d, *J* 2.8, C(6)H), 3.75 (3H, s, ArOMe), 3.89 (1H, d, *J* 14.8, NCHHAr), 5.43 (1H, d, *J* 14.8, NCHHAr), 6.81-6.84 (2H, m, Ar), 7.10-7.14 (2H, m, Ar);  $\delta_{\text{C}}$  (100 MHz, CDCl<sub>3</sub>) 15.8, 17.2, 18.1, 20.4, 27.8, 29.6, 35.5, 46.0, 51.7, 55.1, 60.5, 63.0 114.0, 128.4, 129.4, 155.9, 159.0, 173.2; *m/z* (ESI<sup>+</sup>) 347 ([M+H]<sup>+</sup>, 100%); HRMS (ESI<sup>+</sup>) C<sub>20</sub>H<sub>31</sub>N<sub>2</sub>O<sub>3</sub> ([M+H]<sup>+</sup>) requires 347.2335; found 347.2335.

**(3R,6S)-N(1)-p-Methoxybenzyl-3-benzyl-3,6-di-iso-propyl-5-methoxy-3,6-dihydropyrazine-2-one 63**

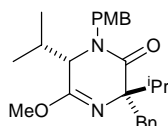

Following *General Procedure 2*, BuLi (1.6 M in hexanes, 0.33 mL, 0.53 mmol), **26** (204 mg, 0.53 mmol), THF (10 mL) and <sup>i</sup>PrI (60 μL, 0.58 mmol) gave a 98:2 mixture of **63:64**. Purification *via* flash column chromatography (eluent 5:1 pentane:Et<sub>2</sub>O) gave **63** as a colourless oil (186 mg, 82%, >98% de);  $[\alpha]_D^{23}$  +5.1 (*c* 3.4 in CHCl<sub>3</sub>);  $\nu_{\max}$  (film) 1699, 1634;  $\delta_{\text{H}}$  (400 MHz, CDCl<sub>3</sub>) -0.22 (3H, d, *J* 6.8, C(6)CHMeMe), 0.71 (3H, d, *J* 6.8, C(3)CHMeMe), 0.83 (3H, d, *J* 7.3, C(6)CHMeMe), 1.03 (3H, d, *J* 6.8, C(3)CHMeMe), 1.70-1.81 (1H, m, C(6)CHMe<sub>2</sub>), 2.30-2.41 (1H, m, C(3)CHMe<sub>2</sub>), 3.01 (1H, d, *J* 12.6, C(3)CHHPh), 3.39 (1H, d, *J* 12.6, C(3)CHHPh), 3.60 (1H, d, *J* 2.5, C(6)H), 3.69 (3H, s, C(5)OMe), 3.79 (3H, s, ArOMe), 4.06 (1H, d, *J* 14.9, NCHHAr), 5.03 (1H, d, *J* 14.9, NCHHAr), 6.79-6.83 (2H, m, Ar), 7.08-7.23 (7H, m, 2 × Ar, 5 × Ph);  $\delta_{\text{C}}$  (100 MHz, CDCl<sub>3</sub>) 14.1, 16.5, 17.9, 20.6, 29.1, 39.1, 43.5, 47.0, 51.9, 55.9, 61.2, 113.7, 126.3, 127.4, 128.2, 128.4, 129.9, 131.3, 138.2, 157.0, 158.8, 171.0; *m/z* (ESI<sup>+</sup>) 423 ([M+H]<sup>+</sup>, 100%); HRMS (ESI<sup>+</sup>) C<sub>26</sub>H<sub>35</sub>N<sub>2</sub>O<sub>3</sub> ([M+H]<sup>+</sup>) requires 423.2648; found 423.2645.

**(3S,6S)-N(1)-p-Methoxybenzyl-3-benzyl-3,6-di-iso-propyl-5-methoxy-3,6-dihydropyrazine-2-one 64**

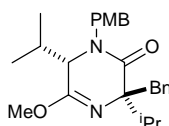

Following *General Procedure 2*, BuLi (2.5 M in hexanes, 0.11 mL, 0.27 mmol), **30** (90 mg, 0.27 mmol), THF (10 mL) and BnBr (35  $\mu$ L, 0.30 mmol) gave a <1:>99 mixture of **63**:**64**. Purification *via* flash column chromatography (eluent 5:1 hexane:Et<sub>2</sub>O) gave **64** as a colourless oil (84 mg, 74%, >98% de);  $[\alpha]_D^{23} +16.4$  (*c* 0.6 in CHCl<sub>3</sub>);  $\nu_{\max}$  (film) 1702, 1644;  $\delta_{\text{H}}$  (400 MHz, CDCl<sub>3</sub>) 0.67 (3H, d, *J* 7.0, C(3)CHMeMe), 0.84 (3H, d, *J* 7.0, C(3)CHMeMe), 0.92 (3H, d, *J* 6.8, C(6)CHMeMe), 1.18 (3H, d, *J* 6.8, C(6)CHMeMe), 1.86-1.95 (1H, m, C(3)CHMe<sub>2</sub>), 2.48-2.59 (1H, m, C(6)CHMe<sub>2</sub>), 2.94 (1H, d, *J* 2.3, C(6)H), 2.98 (1H, d, *J* 12.4, C(3)CHHPh), 3.16 (1H, d, *J* 12.4, C(3)CHHPh), 3.75 (3H, s, C(5)OMe), 3.77 (3H, s, ArOMe), 4.18 (1H, d, *J* 15.3, NCHHAr), 4.48 (1H, d, *J* 15.3, NCHHAr), 6.60-6.71 (2H, m, Ar), 7.09-7.13 (2H, m, Ar), 7.20-7.27 (5H, m, Ph);  $\delta_{\text{C}}$  (100 MHz, CDCl<sub>3</sub>) 16.1, 16.4, 19.7, 20.8, 29.1, 36.4, 45.2, 47.7, 51.8, 55.2, 61.5, 68.0, 114.3, 126.2, 127.8, 128.4, 129.1, 130.6, 137.8, 157.4, 158.5, 171.1; *m/z* (ESI<sup>+</sup>) 423 ([M+H]<sup>+</sup>, 100%); HRMS (ESI<sup>+</sup>) C<sub>26</sub>H<sub>35</sub>N<sub>2</sub>O<sub>3</sub> ([M+H]<sup>+</sup>) requires 423.2648; found 423.2646.

**(3R,6S)-N(1)-p-Methoxybenzyl-3-([N(1)'-(tert-butyloxycarbonyl)-3'-indoyl]methyl)-5-methoxy-6-iso-propyl-3,6-dihydropyrazine-2-one 66**

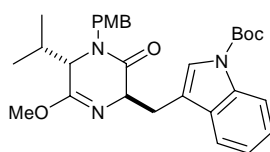

Following *General Procedure 2*, BuLi (2.5 M in hexanes, 1.05 mL, 2.63 mmol), **19** (763 mg, 2.63 mmol), THF (60 mL) and **65** (815 mg, 2.63 mmol) gave a 96.5:3.5 mixture of diastereoisomers. Purification *via* flash column chromatography (eluent 2:1 30-40° petrol:Et<sub>2</sub>O) gave the major diastereoisomer **66** as a pale yellow crystalline solid (1.04 g, 76%, >98% de); mp 112-113°C (DCM-heptane);  $[\alpha]_D^{24} +1.1$  (*c* 0.85 in CHCl<sub>3</sub>);  $\nu_{\max}$  (KBr) 1732, 1698, 1651;  $\delta_{\text{H}}$  (400 MHz, CDCl<sub>3</sub>) 0.88 (3H, d, *J* 7.1, CH<sub>3</sub>CHCH<sub>3</sub>), 0.97 (3H, d, *J* 7.1, CH<sub>3</sub>CHCH<sub>3</sub>), 1.63 (9H, s, CMe<sub>3</sub>), 2.10-2.30 (1H, m, CH<sub>3</sub>CHCH<sub>3</sub>), 3.45 (1H, dd, *J* 4.5, 1.0, C(3)CHH), 3.47 (1H, dd, *J* 4.5, 1.0, C(3)CHH), 3.50 (1H, dd, *J* 3.2, 1.5, C(6)H), 3.63 (3H, s, C(5)OMe), 3.70 (1H, d, *J* 14.8, NCHHAr), 3.74 (3H, s, ArOMe), 4.41 (1H, app td, *J* 4.5, 1.5, C(3)H), 5.44 (1H, d, *J* 14.8, NCHHAr), 6.66-6.73 (4H, m, Ar), 7.21-7.25 (1H, m, C(5')H), 7.27-7.32 (1H, m, C(6')H), 7.51 (1H, s, C(2')H), 7.79 (1H, d, *J* 7.8, C(4')H), 8.17 (1H, br d, *J* 6.1, C(7')H);  $\delta_{\text{C}}$  (100 MHz, CDCl<sub>3</sub>) 17.4, 19.5, 28.2, 29.0, 34.1, 46.1, 52.5, 55.1, 58.8, 60.1, 83.1, 114.0, 114.8, 117.3, 120.3, 122.1, 123.9, 124.7, 127.7, 129.0, 131.7, 135.1, 149.7, 159.0, 159.5, 169.4; *m/z* (ESI<sup>+</sup>) 542 ([M+Na]<sup>+</sup>, 100%), 520 (60); HRMS (ESI<sup>+</sup>) C<sub>30</sub>H<sub>38</sub>N<sub>3</sub>O<sub>5</sub> ([M+H]<sup>+</sup>) requires 520.2811; found 520.2811.



### X-ray crystal structure determination for **66**

Data were collected using an Enraf-Nonius  $\kappa$ -CCD diffractometer with graphite monochromated Mo- $K\alpha$  radiation using standard procedures at 190K. The structure was solved by direct methods, all non-hydrogen atoms were refined with anisotropic thermal parameters. Hydrogen atoms were added at idealised positions. The structure was refined using CRYSTALS.<sup>3</sup>

X-ray crystal structure data for **66** [C<sub>30</sub>H<sub>37</sub>N<sub>3</sub>O<sub>5</sub>]:  $M = 519.64$ , monoclinic, space group P 1 21 1,  $a = 9.3443(3)$  Å,  $b = 9.8498(3)$  Å,  $c = 15.9297(6)$  Å,  $\beta = 103.8663(15)^\circ$ ,  $V = 1423.43(8)$  Å<sup>3</sup>,  $Z = 2$ ,  $\mu = 0.083$  mm<sup>-1</sup>, colourless block, crystal dimensions =  $0.1 \times 0.1 \times 0.1$  mm<sup>3</sup>. A total of 3279 unique reflections were measured for  $5 < \theta < 27$  and 2832 reflections were used in the refinement. The final parameters were  $wR_2 = 0.057$  and  $R_1 = 0.052$  [ $I > \sigma(I)$ ]. Crystallographic data (excluding structure factors) has been deposited with the Cambridge Crystallographic Data Centre as supplementary publication number CCDC 292510. Copies of the data can be obtained, free of charge, on application to CCDC, 12 Union Road, Cambridge, CB2 1EZ, UK [fax: +44(0)-1223-336033 or e-mail: deposit@ccdc.cam.ac.uk].

### (3*S*,6*S*)-*N*(1)-*p*-Methoxybenzyl-3- $\{[N(1)'$ -(*tert*-butyloxycarbonyl)-3'-indoyl]-methyl}-3-methyl-5-methoxy-6-*iso*-propyl-3,6-dihydropyrazine-2-one **67**

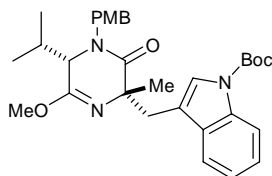

Following *General Procedure 2*, BuLi (1.6 M in hexanes, 0.50 mL, 0.80 mmol), **66** (415 mg, 0.80 mmol), THF (40 mL) and MeI (50  $\mu$ L, 0.88 mmol) gave a 97:3 mixture of diastereoisomers. Purification *via* flash column chromatography (eluent 3:1 30-40° petrol:Et<sub>2</sub>O) gave the major diastereoisomer **67** as a white crystalline solid (322 mg, 76%, >98% de); mp 84-85°C (DCM-heptane);  $[\alpha]_D^{24} -4.9$  ( $c$  2.4 in CHCl<sub>3</sub>);  $\nu_{\max}$  (KBr) 1732, 1699, 1646;  $\delta_{\text{H}}$  (400 MHz, CDCl<sub>3</sub>) 0.30 (3H, d,  $J$  7.1, CH<sub>3</sub>CHCH<sub>3</sub>), 0.89 (3H, d,  $J$  7.1, CH<sub>3</sub>CHCH<sub>3</sub>), 1.49 (3H, s, C(3)Me), 1.67 (9H, s, CMe<sub>3</sub>), 1.87-1.97 (1H, m, CH<sub>3</sub>CHCH<sub>3</sub>), 3.21 (1H, d,  $J$  13.9, C(3)CHH), 3.36 (1H, d,  $J$  13.9, C(3)CHH), 3.60 (3H, s, C(5)OMe), 3.67 (1H, d,  $J$  2.5, C(6)H), 3.79 (3H, s, ArOMe), 3.88 (1H, d,  $J$  15.0, NCHHAr), 5.33 (1H, d,  $J$  15.0, NCHHAr), 6.81-6.84 (2H, m, Ar), 7.07-7.10 (2H, m, Ar), 7.19-7.24 (1H, m, C(5')H), 7.25-7.30 (1H, m, C(6')H), 7.50 (1H, s, C(2')H), 7.69 (1H, d,  $J$  7.8,

<sup>3</sup> D. J. Watkin, C. K. Prout, J. R. Carruthers, P. W. Betteridge and R. I. Cooper, CRYSTALS, 2001, Issue 11, Chemical Crystallography Laboratory, University of Oxford, UK.

C(4')H), 8.08 (1H, br, d,  $J$  7.6, C(7')H);  $\delta_{\text{C}}$  (100 MHz,  $\text{CDCl}_3$ ) 15.7, 20.3, 28.2, 29.7, 30.5, 35.7, 46.4, 52.0, 55.2, 61.0, 61.8, 83.2, 114.1, 114.8, 116.6, 120.4, 122.0, 123.9, 125.2, 128.4, 129.3, 131.8, 134.7, 150.3, 156.0, 159.0, 172.3;  $m/z$  ( $\text{ESI}^+$ ) 556 ( $[\text{M}+\text{Na}]^+$ , 100%), 354 (80); HRMS ( $\text{ESI}^+$ )  $\text{C}_{31}\text{H}_{40}\text{N}_3\text{O}_5$  ( $[\text{M}+\text{H}]^+$ ) requires 534.2968; found 534.2966.

#### X-ray crystal structure determination for 67

Data were collected using an Enraf-Nonius  $\kappa$ -CCD diffractometer with graphite monochromated Mo- $K\alpha$  radiation using standard procedures at 190K. The structure was solved by direct methods, all non-hydrogen atoms were refined with anisotropic thermal parameters. Hydrogen atoms were added at idealised positions. The structure was refined using CRYSTALS.<sup>4</sup>

X-ray crystal structure data for **67** [ $\text{C}_{31}\text{H}_{43}\text{N}_3\text{O}_7$ ]:  $M = 569.70$ , orthorhombic, space group P 21 21 21,  $a = 9.4150(1)$  Å,  $b = 33.8450(4)$  Å,  $c = 9.5680(2)$  Å,  $V = 3048.85(8)$  Å<sup>3</sup>,  $Z = 4$ ,  $\mu = 0.088$  mm<sup>-1</sup>, colourless block, crystal dimensions =  $0.1 \times 0.1 \times 0.1$  mm<sup>3</sup>. A total of 3860 unique reflections were measured for  $5 < \theta < 27$  and 3329 reflections were used in the refinement. The final parameters were  $wR_2 = 0.072$  and  $R_1 = 0.072$  [ $I > \sigma(I)$ ]. Crystallographic data (excluding structure factors) has been deposited with the Cambridge Crystallographic Data Centre as supplementary publication number CCDC 292511. Copies of the data can be obtained, free of charge, on application to CCDC, 12 Union Road, Cambridge, CB2 1EZ, UK [fax: +44(0)-1223-336033 or e-mail: deposit@ccdc.cam.ac.uk].

#### (3*R*,6*S*)-3-Benzyl-3-methyl-6-*iso*-propyl-piperazine-2,5-dione **68**

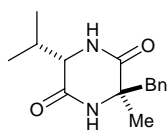

Following *General Procedure 3*, **59** (1.29 g, 3.26 mmol) and TFA (50 mL) gave **68** as an off white solid (509 mg, 60%); mp 280-282°C;  $[\alpha]_D^{23} -22.0$  ( $c$  0.9 in  $\text{CH}_3\text{CO}_2\text{H}$ );  $\nu_{\text{max}}$  (KBr) 3193, 1670;  $\delta_{\text{H}}$  (400 MHz,  $\text{DMSO}-d_6$ ) 0.70 (3H, d,  $J$  6.8,  $\text{CH}_3\text{CHCH}_3$ ), 0.78 (3H, d,  $J$  6.8,  $\text{CH}_3\text{CHCH}_3$ ), 1.42 (3H, s, C(3)Me), 1.93-2.02 (1H, m,  $\text{CH}_3\text{CHCH}_3$ ), 2.67 (1H, dd,  $J$  2.5, 1.7, C(6)H), 2.67 (1H, d,  $J$  12.9, C(3)CHHPh), 3.08 (1H, d,  $J$  12.9, C(3)CHHPh), 7.11-7.15 (2H, m, Ph), 7.22-7.26 (3H, m, Ph), 7.76 (1H, app br s, N(1)H), 8.24 (1H, app br s, N(4)H);  $\delta_{\text{C}}$  (100 MHz,  $\text{DMSO}-d_6$ ) 17.3, 18.9, 28.6, 31.8, 47.3, 59.6, 60.4, 127.6, 128.7, 131.1, 137.0,

<sup>4</sup> D. J. Watkin, C. K. Prout, J. R. Carruthers, P. W. Betteridge and R. I. Cooper, CRYSTALS, 2001, Issue 11, Chemical Crystallography Laboratory, University of Oxford, UK.

167.1, 170.4;  $m/z$  ( $\text{Cl}^+$ ) 261 ( $[\text{M}+\text{H}]^+$ , 100%); HRMS ( $\text{Cl}^+$ )  $\text{C}_{15}\text{H}_{21}\text{N}_2\text{O}_2$  ( $[\text{M}+\text{H}]^+$ ) requires 261.1603; found 261.1610.

**(3*S*,6*S*)-3-Benzyl-3-methyl-6-*iso*-propyl-piperazine-2,5-dione **69****

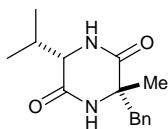

Following *General Procedure 3*, **60** (775 mg, 1.96 mmol) and TFA (40 mL) gave **69** as an off white solid (459 mg, 66%); mp 283-285°C;  $[\alpha]_D^{23}$  -11.7 (*c* 1.1 in AcOH);  $\nu_{\text{max}}$  (KBr) 1656;  $\delta_{\text{H}}$  (400 MHz, DMSO- $d_6$ ) 0.11 (3H, d, *J* 6.8,  $\text{CH}_3\text{CHCH}_3$ ), 0.57 (3H, d, *J* 7.1,  $\text{CH}_3\text{CHCH}_3$ ), 1.44 (3H, s, C(3)*Me*), 1.66-1.74 (1H, m,  $\text{CH}_3\text{CHCH}_3$ ), 2.61 (1H, d, *J* 13.1, C(3)*CHHP*h), 3.19 (1H, d, *J* 13.1, C(3)*CHHP*h), 3.59 (1H, dd, *J* 3.3, 1.8, C(6)*H*), 7.12-7.23 (5H, m, *Ph*), 7.72 (1H, app br s, N(1)*H*), 8.21 (1H, br, s, N(4)*H*);  $\delta_{\text{C}}$  (100 MHz, DMSO- $d_6$ ) 16.6, 18.8, 30.4, 31.5, 45.3, 59.8, 60.6, 127.3, 128.6, 131.4, 137.5, 166.7, 170.0;  $m/z$  ( $\text{Cl}^+$ ) 261 ( $[\text{M}+\text{H}]^+$ , 100%); HRMS ( $\text{Cl}^+$ )  $\text{C}_{15}\text{H}_{21}\text{N}_2\text{O}_2$  ( $[\text{M}+\text{H}]^+$ ) requires 261.1603; found 261.1607.

**(3*R*,6*S*)-3,6-Di-*iso*-propyl-3-methyl-piperazine-2,5-dione **70****

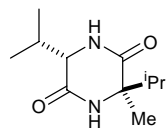

Following *General Procedure 3*, **61** (970 mg, 2.80 mmol) and TFA (50 mL) gave **70** an off white solid (423 mg, 71%); mp 287°C (sub);  $[\alpha]_D^{24}$  +220 (*c* 0.4 in AcOH);  $\nu_{\text{max}}$  (KBr) 3196, 1666;  $\delta_{\text{H}}$  (400 MHz, DMSO- $d_6$ ) 0.82 (3H, d, *J* 6.8, C(3)*CHMeMe*), 0.82 (3H, d, *J* 6.8, C(6)*CHMeMe*), 0.85 (3H, d, *J* 6.8, C(3)*CHMeMe*), 0.94 (3H, d, *J* 7.1, C(6)*CHMeMe*), 1.90-1.99 (1H, m, C(3)*CHMe*<sub>2</sub>), 2.18-2.26 (1H, m, C(6)*CHMe*<sub>2</sub>), 3.75 (1H, dd, *J* 2.0, 1.8, C(6)*H*), 7.88 (1H, app br s, N(1)*H*), 8.02 (1H, br s, N(4)*H*);  $\delta_{\text{C}}$  (100 MHz, DMSO- $d_6$ ) 16.6, 17.3, 18.3, 19.0, 25.3, 32.2, 37.9, 59.8, 61.4, 167.7, 171.3;  $m/z$  ( $\text{Cl}^+$ ) 213 ( $[\text{M}+\text{H}]^+$ , 100%); HRMS ( $\text{Cl}^+$ )  $\text{C}_{11}\text{H}_{21}\text{N}_2\text{O}_2$  ( $[\text{M}+\text{H}]^+$ ) requires 213.1603; found 213.1604.

**(3*S*,6*S*)-3,6-Di-6-*iso*-propyl-3-methyl-piperazine-2,5-dione **71****

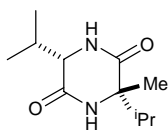

Following *General Procedure 3*, **62** (540 mg, 1.56 mmol) and TFA (40 mL) gave **71** an off white solid (290 mg, 87%); mp 289-290°C;  $[\alpha]_D^{23}$  +101 (*c* 0.4 in AcOH);  $\nu_{\text{max}}$  (KBr) 3190, 1663;  $\delta_{\text{H}}$  (400 MHz, DMSO- $d_6$ )

0.82 (3H, d,  $J$  6.8, C(3)CHMeMe), 0.83 (3H, d,  $J$  6.8, C(6)CHMeMe), 0.88 (3H, d,  $J$  7.1, C(3)CHMeMe), 0.96 (3H, d,  $J$  7.3, C(6)CHMeMe), 1.27 (3H, s, C(3)Me), 2.00-2.08 (1H, m, C(3)CHMe<sub>2</sub>), 2.14-2.27 (1H, m, C(6)CHMe<sub>2</sub>), 3.79 (1H, dd,  $J$  2.7, 1.5, C(6)H), 7.81 (1H, app br s, N(1)H), 7.84 (1H, br s, N(4)H);  $\delta_C$  (100 MHz, DMSO-*d*<sub>6</sub>) 16.5, 18.0, 19.0, 19.3, 25.7, 31.6, 36.0, 59.7, 61.5, 167.8, 171.5;  $m/z$  (CI<sup>+</sup>) 213 ([M+H]<sup>+</sup>, 100%); HRMS (CI<sup>+</sup>) C<sub>10</sub>H<sub>21</sub>N<sub>2</sub>O<sub>2</sub> ([M+H]<sup>+</sup>) requires 213.1603; found 213.1610.

**(3*R*,6*S*)-3,6-Di-*iso*-propyl-3-benzyl-piperazine-2,5-dione 72**

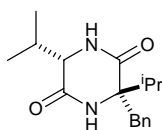

Following *General Procedure 3*, **63** (1.21 g, 2.86 mmol) and TFA (50 mL) gave **72** an off white solid (547 mg, 66%); mp 309°C (sub);  $[\alpha]_D^{24}$  +84.2 (*c* 0.4 in AcOH);  $\nu_{\max}$  (KBr) 3192, 1658;  $\delta_H$  (500 MHz, CF<sub>3</sub>CO<sub>2</sub>D) 0.25 (3H, d,  $J$  7.0, C(6)CHMeMe), 1.01 (3H, d,  $J$  7.3, C(6)CHMeMe), 1.23 (3H, d,  $J$  6.7, C(3)CHMeMe), 1.32 (3H, d,  $J$  7.0, C(3)CHMeMe), 2.12-2.19 (1H, m, C(6)CHMe<sub>2</sub>), 2.56-2.65 (1H, m, C(3)CHMe<sub>2</sub>), 3.18 (1H, d,  $J$  14.0, C(3)CHHPh), 3.59 (1H, d,  $J$  14.0, C(3)CHHPh), 4.22 (1H, d,  $J$  3.4, C(6)H), 7.30-7.45 (5H, m, *Ph*);  $\delta_C$  (125 MHz, CF<sub>3</sub>CO<sub>2</sub>D) 15.8, 16.2, 18.3, 19.1, 33.3, 40.3, 44.2, 61.8, 71.0, 130.1, 131.1, 132.6, 136.2, 174.2, 174.8;  $m/z$  (CI<sup>+</sup>) 289 ([M+H]<sup>+</sup>, 100%); HRMS (CI<sup>+</sup>) C<sub>17</sub>H<sub>25</sub>N<sub>2</sub>O<sub>2</sub> ([M+H]<sup>+</sup>) requires 289.1916; found 289.1909.

**(3*S*,6*S*)-3,6-Di-*iso*-propyl-3-benzyl-piperazine-2,5-dione 73**

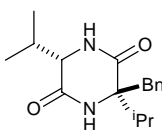

Following *General Procedure 3*, **64** (390 mg, 0.92 mmol) and TFA (30 mL) gave **73** as an off white solid (230 mg, 86%); mp 324°C (sub);  $[\alpha]_D^{23}$  -20.5 (*c* 0.4 in AcOH);  $\nu_{\max}$  (KBr) 3191, 1667;  $\delta_H$  (400 MHz, CF<sub>3</sub>CO<sub>2</sub>D) 0.98 (3H, d,  $J$  6.9, C(6)CHMeMe), 1.04 (3H, d,  $J$  6.9, C(6)CHMeMe), 1.20 (3H, d,  $J$  6.5, C(3)CHMeMe), 1.33 (3H, d,  $J$  6.9, C(3)CHMeMe), 2.39-2.46 (1H, m, C(6)CHMe<sub>2</sub>), 2.69-2.75 (1H, m, C(3)CHMe<sub>2</sub>), 2.96 (1H, app d,  $J$  2.3, C(6)H), 3.25 (1H, d,  $J$  13.9, C(3)CHHPh), 3.36 (1H, d,  $J$  13.9, C(3)CHHPh), 7.26-7.29 (2H, m, *Ph*), 7.39-7.46 (3H, m, *Ph*);  $\delta_C$  (100 MHz, CF<sub>3</sub>CO<sub>2</sub>D) 15.9, 16.8, 19.1, 19.7, 33.0, 37.0, 46.8, 61.6, 71.2, 130.4, 131.1, 132.5, 135.7, 175.1, 175.6;  $m/z$  (CI<sup>+</sup>) 289 ([M+H]<sup>+</sup>, 100%); HRMS (CI<sup>+</sup>) C<sub>17</sub>H<sub>25</sub>N<sub>2</sub>O<sub>2</sub> ([M+H]<sup>+</sup>) requires 289.1916; found 289.1907.

**(R)- $\alpha$ -Methyl-phenylalanine methyl ester (R)-75**

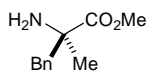

Following *General Procedure 4*, **68** (297 mg, 1.14 mmol) and conc HCl (35 mL) gave a mixture of amino acid hydrochloride salts **35** and (R)-**74** (360 mg);  $\delta_{\text{H}}$  (400 MHz, MeOD) 1.12 (6H, d,  $J$  6.8,  $\text{CH}_3\text{CHCH}_3$ ), 1.66 (3H, s,  $\text{CMe}$ ), 2.30-2.39 (1H, m,  $\text{CH}_3\text{CHCH}_3$ ), 3.16 (1H, d,  $J$  14.3,  $\text{CHHPh}$ ), 3.33 (1H, d,  $J$  14.3,  $\text{CCHHPh}$ ), 3.89 (1H, d,  $J$  4.4,  $^i\text{PrCH}$ ), 7.29-7.41 (5H, m,  $\text{Ph}$ ). Subsequently, following *General Procedure 5*, the mixture of amino acid hydrochloride salts **35** and **74** (360 mg),  $\text{SOCl}_2$  (0.21 mL, 2.75 mmol) and MeOH (40 mL) gave a mixture of amino acid methyl ester hydrochloride salts, which was neutralized and distilled to give (R)-**75** as a colourless oil (166 mg, 66%);  $[\alpha]_{\text{D}}^{24} +11.9$  ( $c$  0.9 in  $\text{CHCl}_3$ );  $\nu_{\text{max}}$  (film) 3368, 1734;  $\delta_{\text{H}}$  (400 MHz,  $\text{CDCl}_3$ ) 1.39 (3H, s,  $\text{CMe}$ ), 2.82 (1H, d,  $J$  13.1,  $\text{CHHPh}$ ), 3.09 (1H, d,  $J$  13.1,  $\text{CHHPh}$ ), 3.68 (3H, s,  $\text{OMe}$ ), 4.81 (2H, br s,  $\text{NH}_2$ ), 7.12-7.32 (5H, m,  $\text{Ph}$ );  $\delta_{\text{C}}$  (100 MHz,  $\text{CDCl}_3$ ) 24.9, 46.2, 51.6, 58.8, 127.1, 128.4, 130.0, 136.6, 176.8;  $m/z$  ( $\text{ESI}^+$ ) 194 ( $[\text{M}+\text{H}]^+$ , 100%); HRMS ( $\text{ESI}^+$ )  $\text{C}_{11}\text{H}_{16}\text{NO}_2$  ( $[\text{M}+\text{H}]^+$ ) requires 194.1181; found 194.1182.

**(S)- $\alpha$ -Methyl-phenylalanine methyl ester (S)-75**

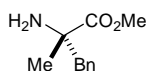

Following *General Procedure 4*, **69** (266 mg, 1.02 mmol) and conc HCl (30 mL) gave a mixture of amino acid hydrochloride salts **35** and (S)-**74** (351 mg). Subsequently, following *General Procedure 5*, the mixture of amino acid hydrochloride salts **35** and (S)-**74** (351 mg), SOCl<sub>2</sub> (0.04 mL, 0.73 mmol) and MeOH (10 mL) gave a mixture of methyl ester hydrochloride salts, which was neutralization and distilled to give (S)-**75** as a colourless oil (129 mg, 74%); [ $\alpha$ ]<sub>D</sub><sup>23</sup> -14.1 (*c* 1.6 in CHCl<sub>3</sub>).

**(R)- $\alpha$ -Methyl-valine methyl ester hydrochloride (R)-80**

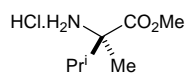

Following *General Procedure 4*, **55** (390 mg, 1.62 mmol) in conc HCl (30 mL) gave a mixture of amino acid hydrochloride salts **77** and (R)-**78** (539 mg);  $\delta_{\text{H}}$  (400 MHz, MeOD) 1.04-1.10 (9H, m, CH<sub>3</sub>CHCH<sub>3</sub>, CH<sub>3</sub>CHCH<sub>3</sub>), 1.17 (3H, d, *J* 7.1, CH<sub>3</sub>CHCH<sub>3</sub>), 1.55 (3H, s, *CMe*), 2.16-2.26 (1H, m, CH<sub>3</sub>CHCH<sub>3</sub>), 2.32-2.41 (1H, m, CH<sub>3</sub>CHCH<sub>3</sub>), 2.77 (3H, s, NCH<sub>3</sub>), 3.89 (1H, d, *J* 3.8, <sup>1</sup>PrCH). Subsequently, following *General Procedure 11*, the mixture of amino acid salts **77** and (R)-**78** (539 mg), SOCl<sub>2</sub> (2 mL, 27.4 mmol) and MeOH (50 mL) gave a mixture of methyl ester hydrochloride salts which was neutralised according to *General Procedure 5*, separated *via* flash column chromatography (eluent 3:1 30-40° petrol:Et<sub>2</sub>O) and re-acidified to give **79** as a white solid (first to elute, 238 mg, 81%) and (R)-**80** as a white solid (second to elute, 231 mg, 80%).

Data for **79**: mp 103-104°C; [ $\alpha$ ]<sub>D</sub><sup>22</sup> +19.9 (*c* 0.85 in MeOH);  $\delta_{\text{H}}$  (400 MHz, CDCl<sub>3</sub>) 1.09 (3H, d, *J* 7.0, CH<sub>3</sub>CHCH<sub>3</sub>), 1.14 (3H, d, *J* 7.0, CH<sub>3</sub>CHCH<sub>3</sub>), 2.50-2.61 (1H, m, CH<sub>3</sub>CHCH<sub>3</sub>), 2.74 (3H, s, *NMe*), 3.60 (1H, d, *J* 4.5, <sup>1</sup>PrCH), 3.83 (3H, s, *OMe*), 4.81 (2H, br s, NH<sub>2</sub>).

Data for (R)-**80**: mp 143-144°C; [ $\alpha$ ]<sub>D</sub><sup>22</sup> -4.3 (*c* 0.65 in MeOH);  $\nu_{\text{max}}$  (KBr) 1750;  $\delta_{\text{H}}$  (400 MHz, MeOD) 1.08-1.15 (6H, m, CH<sub>3</sub>CHCH<sub>3</sub>), 1.69 (3H, s, *CMe*), 2.23-2.32 (1H, m, CH<sub>3</sub>CHCH<sub>3</sub>), 3.82 (3H, s, *OMe*);  $\delta_{\text{C}}$  (100 MHz, MeOD) 16.8, 17.6, 20.1, 37.5, 53.0, 64.2, 170.7; *m/z* (ESI<sup>+</sup>) 146 ([M-Cl]<sup>+</sup>, 100%); HRMS (ESI<sup>+</sup>) C<sub>7</sub>H<sub>16</sub>NO<sub>2</sub> (M-Cl)<sup>+</sup> requires 146.1181; found 146.1182.

### (S)- $\alpha$ -Methyl-valine methyl ester hydrochloride (**S**)-**80**

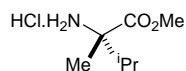

Following *General Procedure 4*, **56** (416 mg, 1.73 mmol) in conc HCl (30 mL) gave a mixture of amino acid hydrochloride salts **77** and (**S**)-**78** (575 mg). Subsequently, following *General Procedure 5*, the mixture of amino acid salts **77** and (**S**)-**78** (575 mg), SOCl<sub>2</sub> (2 mL, 27.4 mmol) and MeOH (50 mL) gave a mixture of methyl ester hydrochloride salts which was neutralised according to *General Procedure 5*, separated via flash column chromatography (eluent 3:1 30-40° petrol:Et<sub>2</sub>O) and re-acidified to give **79** as a white solid (first to elute, 236 mg, 75%) and (**R**)-**80** as a white solid (second to elute, 217 mg, 69%); [ $\alpha$ ]<sub>D</sub><sup>22</sup> +4.5 (*c* 1.2 in MeOH).

### HN[(**R**)- $\alpha$ -Benzyl-valine][(S)-*N*-methyl-valine]OH hydrochloride **81**

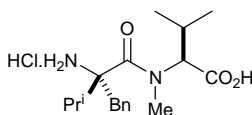

A solution of **57** (537 mg, 1.70 mmol) in conc HCl (30 mL) was subjected to reflux for 16 h before being concentrated *in vacuo*. This process was repeated 6 times. The residue was then dried under high vacuum to give **81** (590 mg, 97%); mp 158-159°C; [ $\alpha$ ]<sub>D</sub><sup>22</sup> +6.1 (*c* 2.5 in CHCl<sub>3</sub>);  $\nu_{\max}$  (KBr) 1718, 1628;  $\delta_{\text{H}}$  (400 MHz, MeOD) 1.08 (3H, d, *J* 6.8, CH<sub>3</sub>CHCH<sub>3</sub>), 1.12 (3H, d, *J* 7.1, CH<sub>3</sub>CHCH<sub>3</sub>), 1.14 (3H, d, *J* 6.8, CH<sub>3</sub>CHCH<sub>3</sub>), 1.15 (3H, d, *J* 6.8, CH<sub>3</sub>CHCH<sub>3</sub>), 2.21-2.32 (2H, m, 2 × CH<sub>3</sub>CHCH<sub>3</sub>), 2.71 (3H, s, NMe), 3.04 (1H, d, *J* 14.1, CHHPh), 3.35 (1H, d, *J* 14.1, CHHPh), 3.39 (1H, d, *J* 3.8, <sup>1</sup>PrCH), 7.21-7.38 (5H, m, Ph);  $\delta_{\text{C}}$  (100 MHz, MeOD) 15.9, 17.1, 17.4, 18.1, 23.7, 32.7, 34.0, 40.1, 69.7, 93.7, 127.6, 128.8, 130.5, 135.0, 168.4, 176.2; *m/z* (ESI<sup>+</sup>) 321 ([M-Cl]<sup>+</sup>, 100%); HRMS (ESI<sup>+</sup>) C<sub>18</sub>H<sub>29</sub>N<sub>2</sub>O<sub>3</sub> ([M-Cl]<sup>+</sup>) requires 321.2178; found 321.2182.

### HN[(S)- $\alpha$ -Benzyl-valine][(S)-*N*-methyl-valine]OH hydrochloride **82**

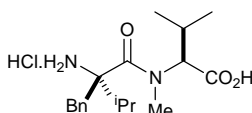

A solution of **58** (412 mg, 1.30 mmol) in conc HCl (30 mL) was subjected to reflux for 16 h before being concentrated *in vacuo*. This process was repeated 6 times. The residue was then dried under high vacuum to give **82** as a pale yellow crystalline solid (460 mg, 99%); mp 175-177°C; [ $\alpha$ ]<sub>D</sub><sup>23</sup> -31.2 (*c* 0.6 in CH<sub>3</sub>OH);  $\nu_{\max}$  (KBr) 1672, 1641;  $\delta_{\text{H}}$  (400 MHz, CDCl<sub>3</sub>) 0.85 (3H, d, *J* 6.8, CH(CH<sub>3</sub>CHCH<sub>3</sub>)), 0.98 (3H, d, *J* 6.8,

C(CH<sub>3</sub>CHCH<sub>3</sub>)), 1.04 (3H, d, *J* 7.1, CH(CH<sub>3</sub>CHCH<sub>3</sub>)), 1.10 (3H, d, *J* 7.1, C(CH<sub>3</sub>CHCH<sub>3</sub>)), 2.07-2.17 (1H, m, CH(CH<sub>3</sub>CHCH<sub>3</sub>)), 2.41-2.49 (1H, m, C(CH<sub>3</sub>CHCH<sub>3</sub>)), 2.60 (3H, s, NMe), 2.63 (1H, d, *J* 3.0, <sup>1</sup>PrCH), 2.97 (1H, d, *J* 13.0, CHHPPh), 3.01 (1H, d, *J* 13.0, CHHPPh), 7.10-7.16 (2H, m, Ph), 7.24-7.29 (3H, m, Ph); δ<sub>C</sub> (100 MHz, CDCl<sub>3</sub>) 15.1, 16.4, 18.7, 19.3, 30.9, 32.9, 35.7, 46.0, 66.2, 96.1, 127.3, 128.1, 130.7, 135.9, 168.4, 168.7; *m/z* (ESI<sup>+</sup>) 321 ([M-Cl]<sup>+</sup>, 100%); HRMS (ESI<sup>+</sup>) C<sub>18</sub>H<sub>29</sub>N<sub>2</sub>O<sub>3</sub> ([M-Cl]<sup>+</sup>) requires 321.2178; found 321.2163.

### HN[(*R*)-α-Benzyl-valine][(S)-valine]OMe **83**

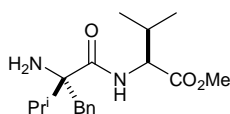

CAN (90 mg, 0.15 mmol) was added to a solution of **63** (23 mg, 0.05 mmol) in MeCN (3.5 mL) and H<sub>2</sub>O (1.5 mL). The resultant mixture was stirred at rt for 16 h then quenched with sat aq K<sub>2</sub>CO<sub>3</sub> solution. H<sub>2</sub>O was then added followed by an organic extraction with DCM. The organic extract was dried and concentrated *in vacuo* to give **83** as a colourless oil (18 mg, 80%); ν<sub>max</sub> (film) 1699, 1664; δ<sub>H</sub> (400 MHz, CDCl<sub>3</sub>) 0.69 (3H, d, *J* 6.8, CH<sub>3</sub>CHCH<sub>3</sub>), 0.74 (3H, d, *J* 7.2, CH<sub>3</sub>CHCH<sub>3</sub>), 0.80 (3H, d, *J* 6.5, CH<sub>3</sub>CHCH<sub>3</sub>), 1.13 (3H, d, *J* 6.5, CH<sub>3</sub>CHCH<sub>3</sub>), 2.01-2.10 (1H, m, CH<sub>3</sub>CHCH<sub>3</sub>), 2.47-2.56 (1H, m, CH<sub>3</sub>CHCH<sub>3</sub>), 2.92 (1H, d, *J* 12.6, CHHPPh), 3.07 (1H, d, *J* 12.6, CHHPPh), 3.76 (3H, s, OMe), 3.80 (1H, m, <sup>1</sup>PrCH), 5.44 (1H, app br s, CONH), 7.07-7.23 (5H, m, Ph), 7.27 (2H, s, NH<sub>2</sub>); *m/z* (ESI<sup>+</sup>) 321 ([M+H]<sup>+</sup>, 100 %); HRMS (ESI<sup>+</sup>) C<sub>18</sub>H<sub>29</sub>N<sub>2</sub>O<sub>3</sub> ([M+H]<sup>+</sup>) requires 321.2178; found 321.2176.

### HN[(S)-α-Benzyl-valine][(S)-valine]OMe **84**

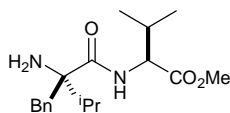

CAN (230 mg, 0.42 mmol) was added to a solution of **64** (59 mg, 0.14 mmol) in MeCN (3.5 mL) and H<sub>2</sub>O (1.5 mL). The resultant mixture was stirred at rt for 16 h then quenched with sat aq K<sub>2</sub>CO<sub>3</sub> solution. H<sub>2</sub>O was then added followed by an organic extraction with DCM. The organic extract was dried and concentrated *in vacuo*. Purification *via* flash column chromatography (eluent 2:98 MeOH:CHCl<sub>3</sub>) gave **84** as a colourless oil (30 mg, 67%); [α]<sub>D</sub><sup>24</sup> +44.9 (*c* 1.0 in CHCl<sub>3</sub>); ν<sub>max</sub> (film) 1699, 1665; δ<sub>H</sub> (400 MHz, CDCl<sub>3</sub>) -0.07 (3H, d, *J* 6.8, CH<sub>3</sub>CHCH<sub>3</sub>), 0.68 (3H, d, *J* 7.3, CH<sub>3</sub>CHCH<sub>3</sub>), 0.85 (3H, d, *J* 6.6, CH<sub>3</sub>CHCH<sub>3</sub>), 1.06 (3H, d, *J* 6.6, CH<sub>3</sub>CHCH<sub>3</sub>), 1.80-1.89 (1H, m, CH<sub>3</sub>CHCH<sub>3</sub>), 2.25-2.35 (1H, m, CH<sub>3</sub>CHCH<sub>3</sub>), 2.95 (1H, d, *J*



12.5, *CHHP*h), 3.31 (1H, d, *J* 12.5, *CHHP*h), 3.74 (3H, s, *OMe*), 3.75 (1H, m, <sup>1</sup>*PrCH*), 5.93 (1H, br d, *J* 8.6, *CONH*), 7.12-7.14 (5H, m, *Ph*), 7.16 (2H, s, *NH*<sub>2</sub>); δ<sub>c</sub> (100 MHz, CDCl<sub>3</sub>) 14.3, 16.1, 18.0 (2C), 30.0, 37.9, 43.1, 52.7, 57.6, 67.9, 126.1, 127.7, 131.1, 137.8, 156.9, 172.6; *m/z* (ESI<sup>+</sup>) 321 ([*M*+*H*]<sup>+</sup>, 100%); HRMS C<sub>18</sub>H<sub>29</sub>N<sub>2</sub>O<sub>3</sub> ([*M*+*H*]<sup>+</sup>) requires 321.2178; found 321.2176.
